# Supplementary material
Source: PubMed Central journal article supplement (PMC8661019)
Supplement: mmc1.pdf [file mmc1.pdf]

# Supporting Information

## **Novel dynamic residue network analysis approaches to study allosteric modulation: SARS-CoV-2 M<sup>pro</sup> and its evolutionary mutations as a case study**

*Olivier Sheik Amamuddy<sup>#</sup>, Rita Afriyie Boateng<sup>#</sup>, Victor Barozi, Dorothy Wavinya Nyamai and  
Özlem Tastan Bishop\**

Research Unit in Bioinformatics (RUBi), Department of Biochemistry and Microbiology,  
Rhodes University, Makhanda, South Africa

# Equally contributed first authorship

\* **Corresponding Author: Özlem Tastan Bishop (o.tastanbishop@ru.ac.za)**

**Table S1.** List of mutations and sample IDs extracted from GISAID database.

| <b>Mutation Position</b> | <b>Strain ID</b> | <b>Mutation Position</b> | <b>Strain ID</b> | <b>Mutation Position</b> | <b>Strain ID</b> |
|--------------------------|------------------|--------------------------|------------------|--------------------------|------------------|
| A7V                      | EPI_ISL_425319   | A116V                    | EPI_ISL_425284   | T198I                    | EPI_ISL_421515   |
| G15D                     | EPI_ISL_420422   | A129V                    | EPI_ISL_422860   | T201A                    | EPI_ISL_423642   |
| G15S                     | EPI_ISL_420181   | R105H                    | EPI_ISL_419984   | L220F                    | EPI_ISL_419256   |
| M17I                     | EPI_ISL_423772   | A129V                    | EPI_ISL_422860   | Y237H                    | EPI_ISL_416720   |
| V20L                     | EPI_ISL_425342   | P132L                    | EPI_ISL_420579   | D248E                    | EPI_ISL_425886   |
| T45I                     | EPI_ISL_421312   | T135I                    | EPI_ISL_425655   | A255V                    | EPI_ISL_418075   |
| M49I                     | EPI_ISL_425839   | I136V                    | EPI_ISL_420182   | I259T                    | EPI_ISL_422919   |
| R60C                     | EPI_ISL_418269   | N151D                    | EPI_ISL_420510   | A260V                    | EPI_ISL_423725   |
| K61R                     | EPI_ISL_420306   | V157I                    | EPI_ISL_415503   | V261A                    | EPI_ISL_425498   |
| A70T                     | EPI_ISL_421763   | C160S                    | EPI_ISL_417413   | A266V                    | EPI_ISL_421380   |
| G71S                     | EPI_ISL_413021   | A173V                    | EPI_ISL_418082   | N274D                    | EPI_ISL_420610   |
| L89F                     | EPI_ISL_415643   | P184L                    | EPI_ISL_420241   | R279C                    | EPI_ISL_425643   |
| K90R                     | EPI_ISL_420059   | P184S                    | EPI_ISL_423288   | S301L                    | EPI_ISL_422184   |
| P99L                     | EPI_ISL_419756   | T190I                    | EPI_ISL_423007   | G15S, D48E               | EPI_ISL_425242   |
| Y101C                    | EPI_ISL_425132   | A193V                    | EPI_ISL_415610   |                          |                  |
| P108S                    | EPI_ISL_421005   | T196M                    | EPI_ISL_424470   |                          |                  |

**Table S2. Molecular interactions established between hits and their respective allosteric site residues in SARS-CoV-2 M<sup>pro</sup>. In black and red labels are residues from protomer A and B respectively. Functional group of hits are indicated in brackets closer to the residue. H-bond lengths for all H-bonds are shown.**

| Compound ID | H-bonds                                                    | H-bond length (Å)    | hydrophobic                                                                                             | Pi-                                 | Compound ID | H- bonds                                        | H-bond length (Å)    | Hydrophobic                                                                                                | Pi-               |
|-------------|------------------------------------------------------------|----------------------|---------------------------------------------------------------------------------------------------------|-------------------------------------|-------------|-------------------------------------------------|----------------------|------------------------------------------------------------------------------------------------------------|-------------------|
| SANC00302   |                                                            |                      | PHE3, ALA7, <b>PHE8</b> ,<br>PRO9, <b>SER123</b> , <b>GLY124</b> ,<br>GLU290, GLN299                    | MET6, PHE291,<br>ASP295,<br>ARG298  | SANC00468   | MET6 (O9)<br><b>SER123</b> (O18)<br>GLN299 (O8) | 3.10<br>2.67<br>2.94 | PHE3, ALA7, <b>PHE8</b> ,<br>PRO9, SER113,<br><b>GLY124</b> , GLN127,<br>PHE291, ASP295,<br>GLY302, VAL303 | MET6,<br>ARG298   |
| SANC00303   |                                                            |                      | PHE3, ALA7, <b>PHE8</b> ,<br>PRO9, SER113, <b>SER123</b> ,<br><b>GLY124</b> , GLN127,<br>GLU290, GLN299 | MET6, PHE291,<br>ASP295,<br>ARG298  | SANC00469   | MET6 (O13)<br><b>Val303</b> (O11)               | 2.45<br>2.52         | ALA7, PHE8,<br>GLY124, SER113,<br>PHE291, TYR118,<br>GLN299,                                               | ASP229,<br>ARG298 |
| SANC00467   | <b>MET6 (O3)</b><br><b>MET6 (O4)</b><br><b>VAL303 (O2)</b> | 3.12<br>2.82<br>3.10 |                                                                                                         | <b>ARG298, PHE8,</b><br><b>MET6</b> | SANC00630   | <b>SER123 (O2)</b><br>GLN299 (O1)               | 2.71<br>2.88         | PHE3, ALA7, PHE8,<br>THR111, SER113,<br><b>GLY124</b> , GLN127,<br>GLU90, F291                             | MET6,<br>ARG298   |

**Table S3. The distribution of ligand stability across mutant samples.** The symbol ‘✓’ indicates highly stable motion. The consensus score across each mutant system is the number of ‘✓’ entries in that row.

| Mutation Position | Strain ID      | 302 | 303 | 467 | 468 | 469 | 630 | Consensus |
|-------------------|----------------|-----|-----|-----|-----|-----|-----|-----------|
| A7V               | EPI_ISL_425319 | ✓   | ✓   |     |     | ✓   |     | 3         |
| G15D              | EPI_ISL_420422 | ✓   |     | ✓   | ✓   | ✓   |     | 4         |
| G15S              | EPI_ISL_420181 | ✓   | ✓   | ✓   |     | ✓   |     | 4         |
| M17I              | EPI_ISL_423772 |     |     | ✓   | ✓   | ✓   | ✓   | 4         |
| V20L              | EPI_ISL_425342 |     | ✓   | ✓   | ✓   | ✓   |     | 4         |
| T45I              | EPI_ISL_421312 | ✓   | ✓   |     | ✓   |     | ✓   | 4         |
| M49I              | EPI_ISL_425839 |     | ✓   | ✓   | ✓   | ✓   | ✓   | 5         |
| R60C              | EPI_ISL_418269 | ✓   |     |     | ✓   | ✓   |     | 2         |
| K61R              | EPI_ISL_420306 |     | ✓   |     | ✓   | ✓   |     | 3         |
| A70T              | EPI_ISL_421763 |     |     | ✓   | ✓   | ✓   | ✓   | 4         |
| G71S              | EPI_ISL_413021 | ✓   |     | ✓   | ✓   | ✓   |     | 4         |
| L89F              | EPI_ISL_415643 |     | ✓   | ✓   | ✓   |     |     | 3         |
| K90R              | EPI_ISL_420059 | ✓   | ✓   |     |     | ✓   |     | 3         |
| P99L              | EPI_ISL_419756 |     |     |     | ✓   | ✓   | ✓   | 3         |
| Y101C             | EPI_ISL_425132 | ✓   |     | ✓   | ✓   | ✓   |     | 4         |
| R105H             | EPI_ISL_419984 | ✓   |     |     | ✓   | ✓   | ✓   | 4         |
| P108S             | EPI_ISL_421005 |     | ✓   |     | ✓   |     | ✓   | 3         |
| A116V             | EPI_ISL_425284 |     | ✓   | ✓   | ✓   |     | ✓   | 4         |
| A129V             | EPI_ISL_422860 |     | ✓   |     |     | ✓   | ✓   | 3         |
| P132L             | EPI_ISL_420579 | ✓   |     | ✓   |     |     | ✓   | 3         |
| T135I             | EPI_ISL_425655 |     |     | ✓   | ✓   | ✓   | ✓   | 4         |
| I136V             | EPI_ISL_420182 |     |     | ✓   | ✓   | ✓   |     | 3         |
| N151D             | EPI_ISL_420510 |     |     |     | ✓   | ✓   |     | 2         |
| V157I             | EPI_ISL_415503 |     | ✓   | ✓   |     |     |     | 2         |
| V157L             | EPI_ISL_426028 |     | ✓   |     | ✓   | ✓   | ✓   | 4         |

| Mutation position | Strain ID      | 302 | 303 | 467 | 468 | 469 | 630 | Consensus |
|-------------------|----------------|-----|-----|-----|-----|-----|-----|-----------|
| C160S             | EPI_ISL_417413 |     |     |     | ✓   | ✓   |     | 2         |
| A173V             | EPI_ISL_418082 | ✓   | ✓   | ✓   | ✓   | ✓   | ✓   | 6         |
| P184L             | EPI_ISL_420241 |     |     |     | ✓   |     | ✓   | 2         |
| P184S             | EPI_ISL_423288 | ✓   |     |     | ✓   | ✓   | ✓   | 4         |
| T190I             | EPI_ISL_423007 | ✓   |     |     | ✓   | ✓   | ✓   | 4         |
| A193V             | EPI_ISL_415610 | ✓   | ✓   | ✓   | ✓   | ✓   |     | 5         |
| T196M             | EPI_ISL_424470 | ✓   |     |     | ✓   | ✓   | ✓   | 4         |
| T198I             | EPI_ISL_421515 |     |     | ✓   | ✓   | ✓   |     | 3         |
| T201A             | EPI_ISL_423642 |     |     | ✓   | ✓   | ✓   | ✓   | 4         |
| L220F             | EPI_ISL_419256 |     |     |     | ✓   | ✓   | ✓   | 3         |
| L232F             | EPI_ISL_421506 | ✓   | ✓   |     | ✓   | ✓   |     | 4         |
| A234V             | EPI_ISL_425235 | ✓   |     |     |     | ✓   | ✓   | 3         |
| K236R             | EPI_ISL_426097 | ✓   | ✓   | ✓   | ✓   | ✓   |     | 5         |
| Y237H             | EPI_ISL_416720 |     |     | ✓   | ✓   | ✓   |     | 3         |
| D248E             | EPI_ISL_425886 |     |     | ✓   | ✓   | ✓   | ✓   | 4         |
| A255V             | EPI_ISL_418075 |     |     |     | ✓   |     | ✓   | 2         |
| I259T             | EPI_ISL_422919 |     |     | ✓   | ✓   |     | ✓   | 3         |
| A260V             | EPI_ISL_423725 |     | ✓   | ✓   | ✓   | ✓   | ✓   | 5         |
| V261A             | EPI_ISL_425498 |     |     | ✓   | ✓   | ✓   |     | 3         |
| A266V             | EPI_ISL_421380 |     | ✓   | ✓   | ✓   | ✓   | ✓   | 5         |
| N274D             | EPI_ISL_420610 | ✓   | ✓   | ✓   | ✓   | ✓   | ✓   | 6         |
| R279C             | EPI_ISL_425643 | ✓   | ✓   | ✓   | ✓   | ✓   | ✓   | 6         |
| S301L             | EPI_ISL_422184 |     |     |     | ✓   | ✓   | ✓   | 3         |
| G15S, D48E        | EPI_ISL_425242 |     | ✓   | ✓   | ✓   | ✓   | ✓   | 5         |
| A191V, L220F      | EPI_ISL_419710 |     |     | ✓   | ✓   | ✓   | ✓   | 4         |

20 22 29 43 41 30

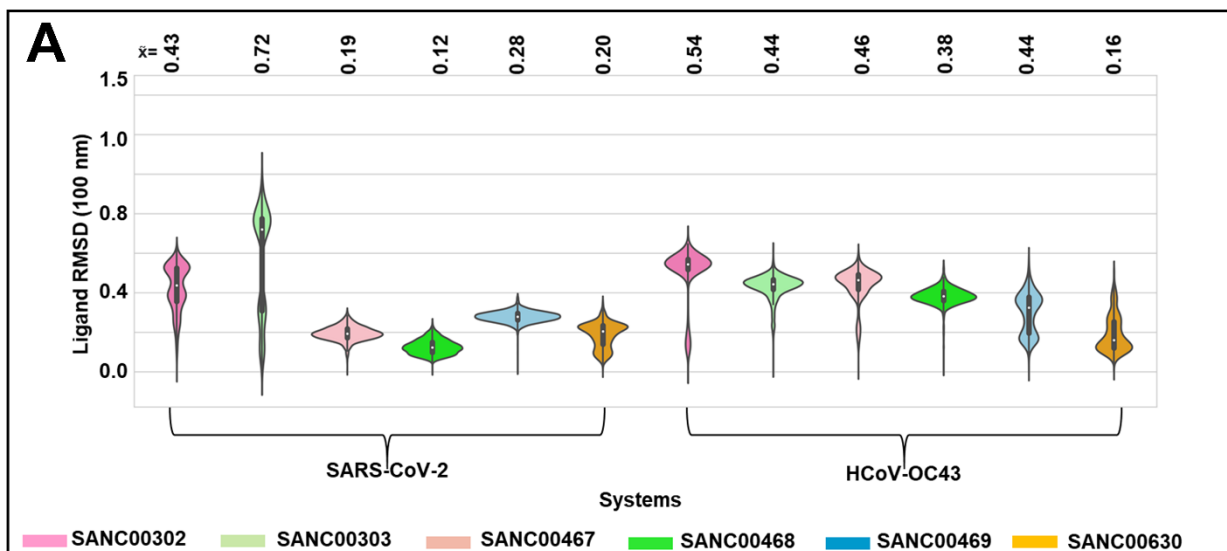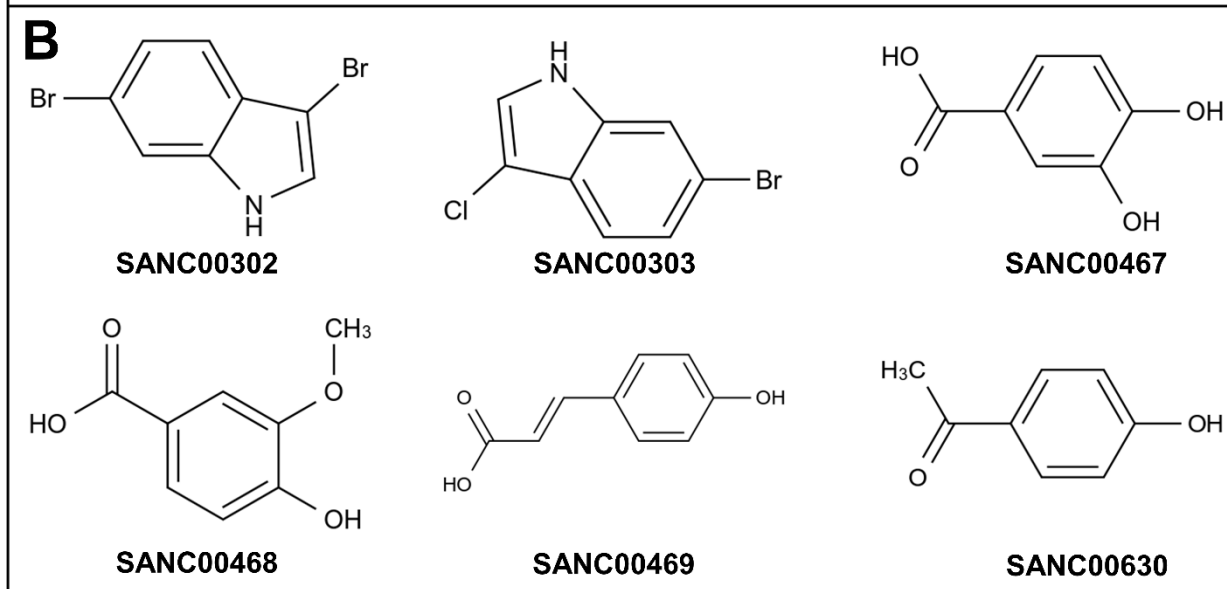

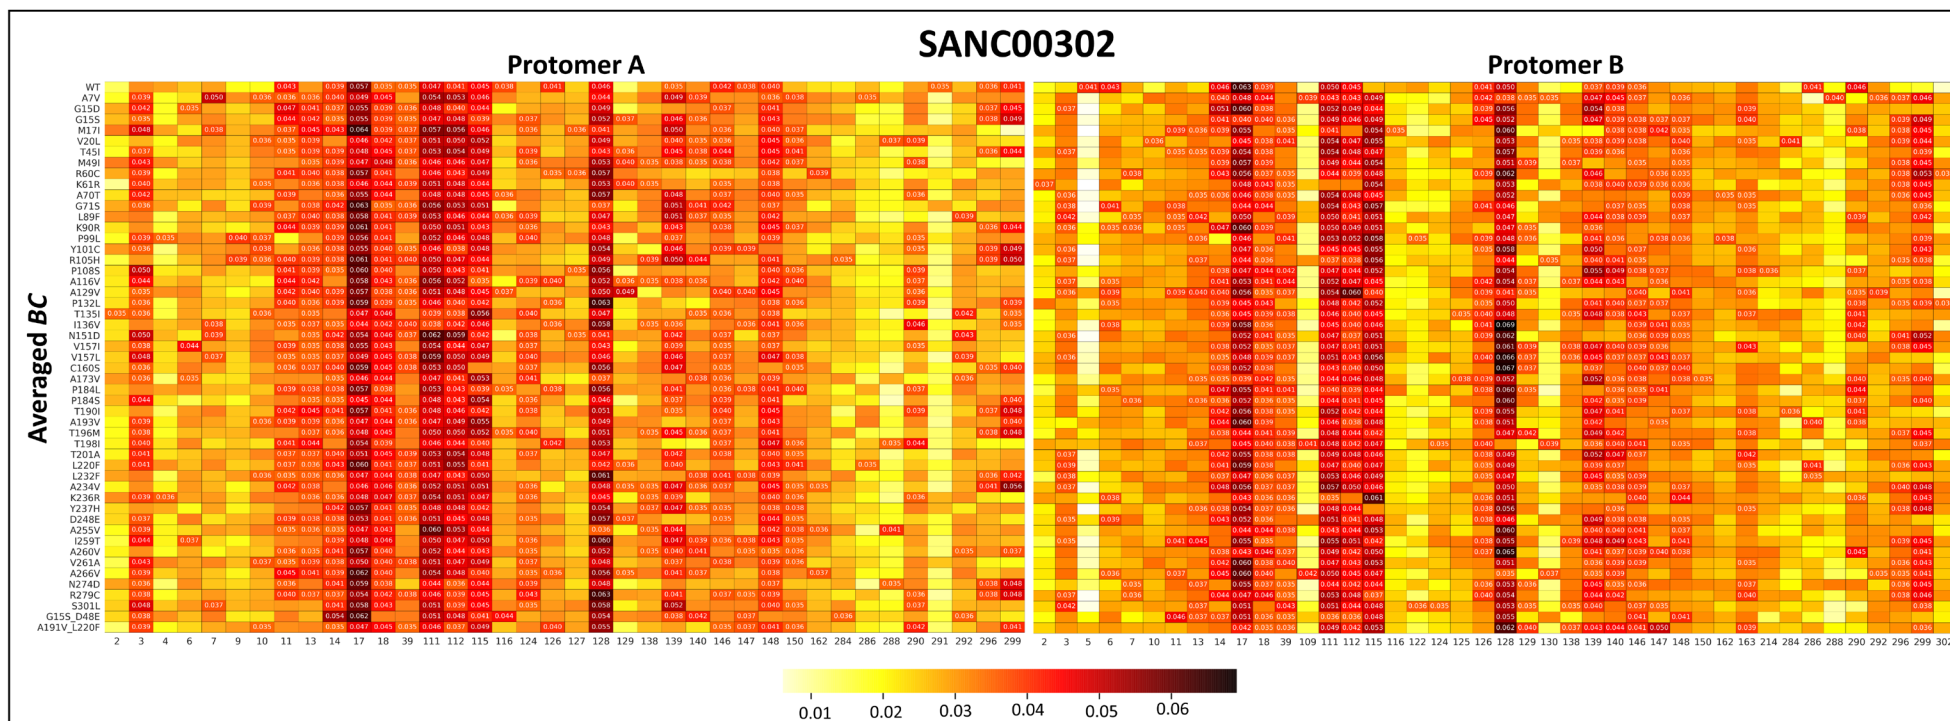

**Figure S2A.** Heatmaps of the potential hubs as per to the global top 5% of the *BC* DRN metric for the reference (WT) and mutant systems in complex with allosteric modulator: SANC00302. *BC* measurements of ligand-bound protomer (chain A) are shown on the left while those of the unbound protomer B are on the right. Residue hubs are annotated with their centrality values, while their homologous residues in alternate samples are not. The colour scale from white, through yellow, orange and red to black indicates the degree of residue centrality.

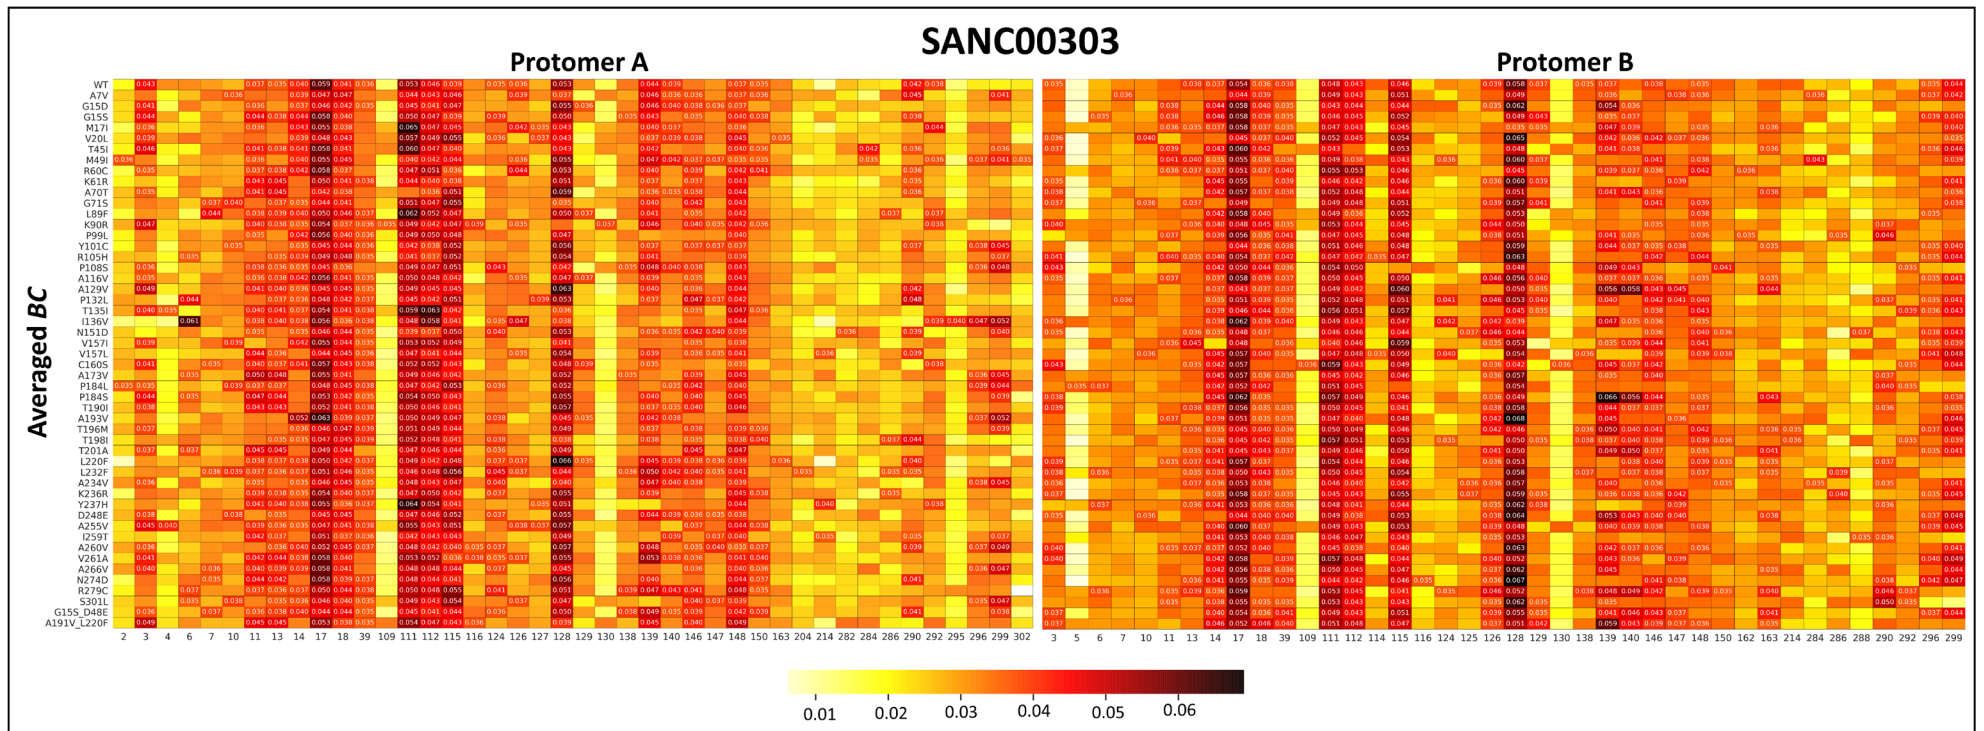

**Figure S2B.** Heatmaps of the potential hubs as per to the global top 5% of the *BC* DRN metric for the reference (WT) and mutant systems in complex with allosteric modulator: SANC00303. *BC* measurements of ligand-bound protomer (chain A) are shown on the left while those of the unbound protomer B are on the right. Residue hubs are annotated with their centrality values, while their homologous residues in alternate samples are not. The colour scale from white, through yellow, orange and red to black indicates the degree of residue centrality.

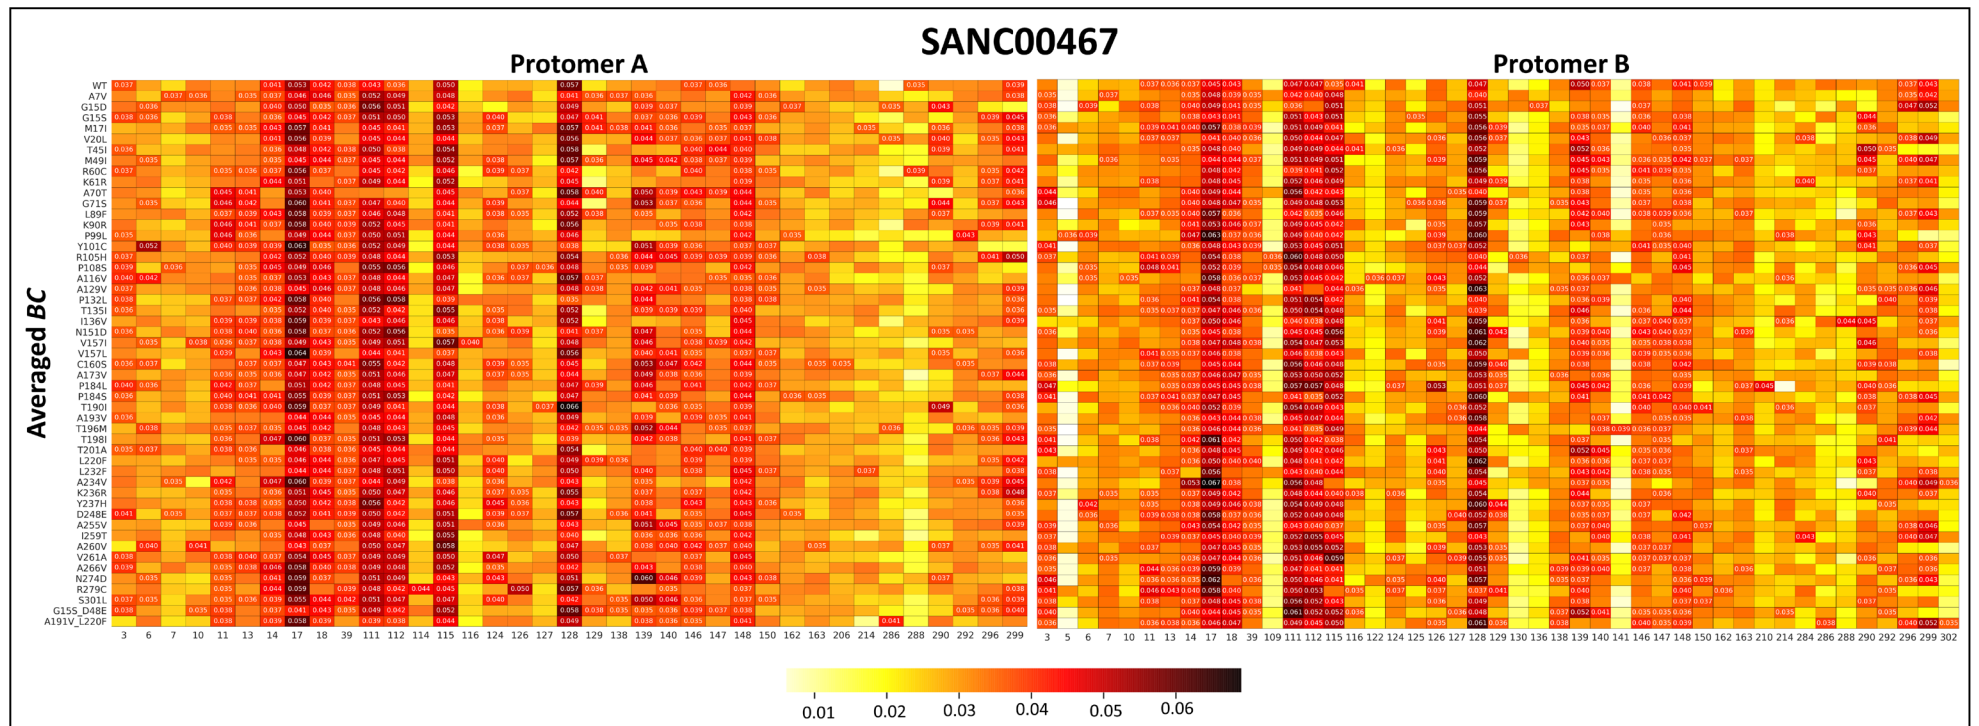

**Figure S2C.** Heatmaps of the potential hubs as per to the global top 5% of the *BC* DRN metric for the reference (WT) and mutant systems in complex with allosteric modulator: SANC00467. *BC* measurements of ligand-bound protomer (chain A) are shown on the left while those of the unbound protomer B are on the right. Residue hubs are annotated with their centrality values, while their homologous residues in alternate samples are not. The color scale from white, through yellow, orange and red to black indicates the degree of residue centrality.



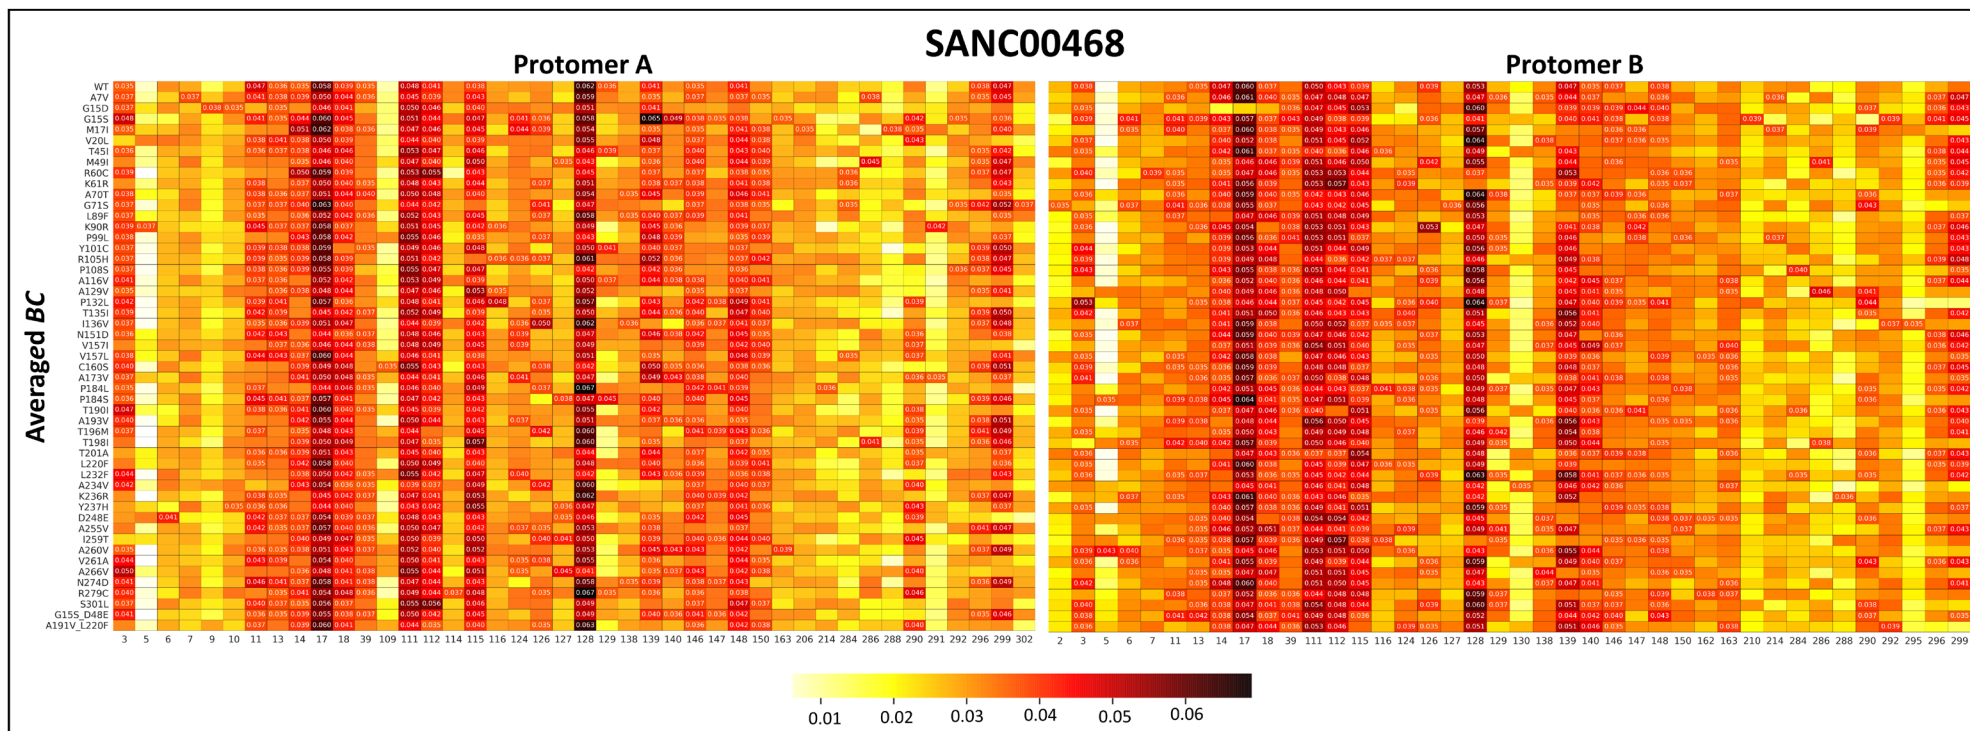

**Figure S2D.** Heatmaps of the potential hubs as per to the global top 5% of the *BC* DRN metric for the reference (WT) and mutant systems in complex with allosteric modulator: SANC00468. *BC* measurements of ligand-bound protomer (chain A) are shown on the left while those of the unbound protomer B are on the right. Residue hubs are annotated with their centrality values, while their homologous residues in alternate samples are not. The colour scale from white, through yellow, orange and red to black indicates the degree of residue centrality.

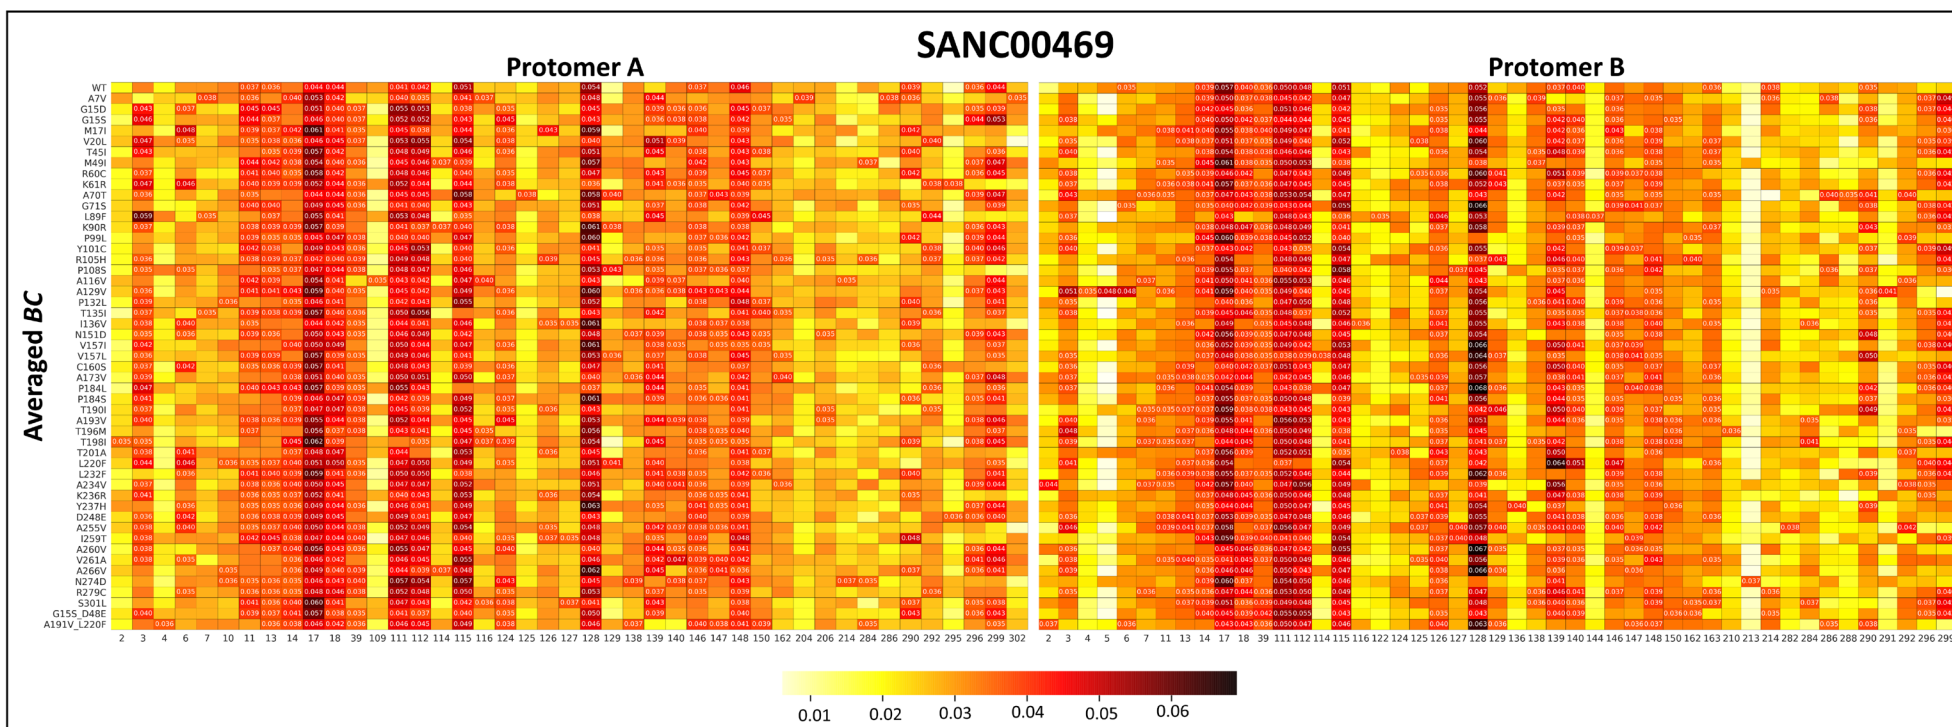

**Figure S2E.** Heatmaps of the potential hubs as per to the global top 5% of the *BC* DRN metric for the reference (WT) and mutant systems in complex with allosteric modulator: SANC00469. *BC* measurements of ligand-bound protomer (chain A) are shown on the left while those of the unbound protomer B are on the right. Residue hubs are annotated with their centrality values, while their homologous residues in alternate samples are not. The colour scale from white, through yellow, orange and red to black indicates the degree of residue centrality.

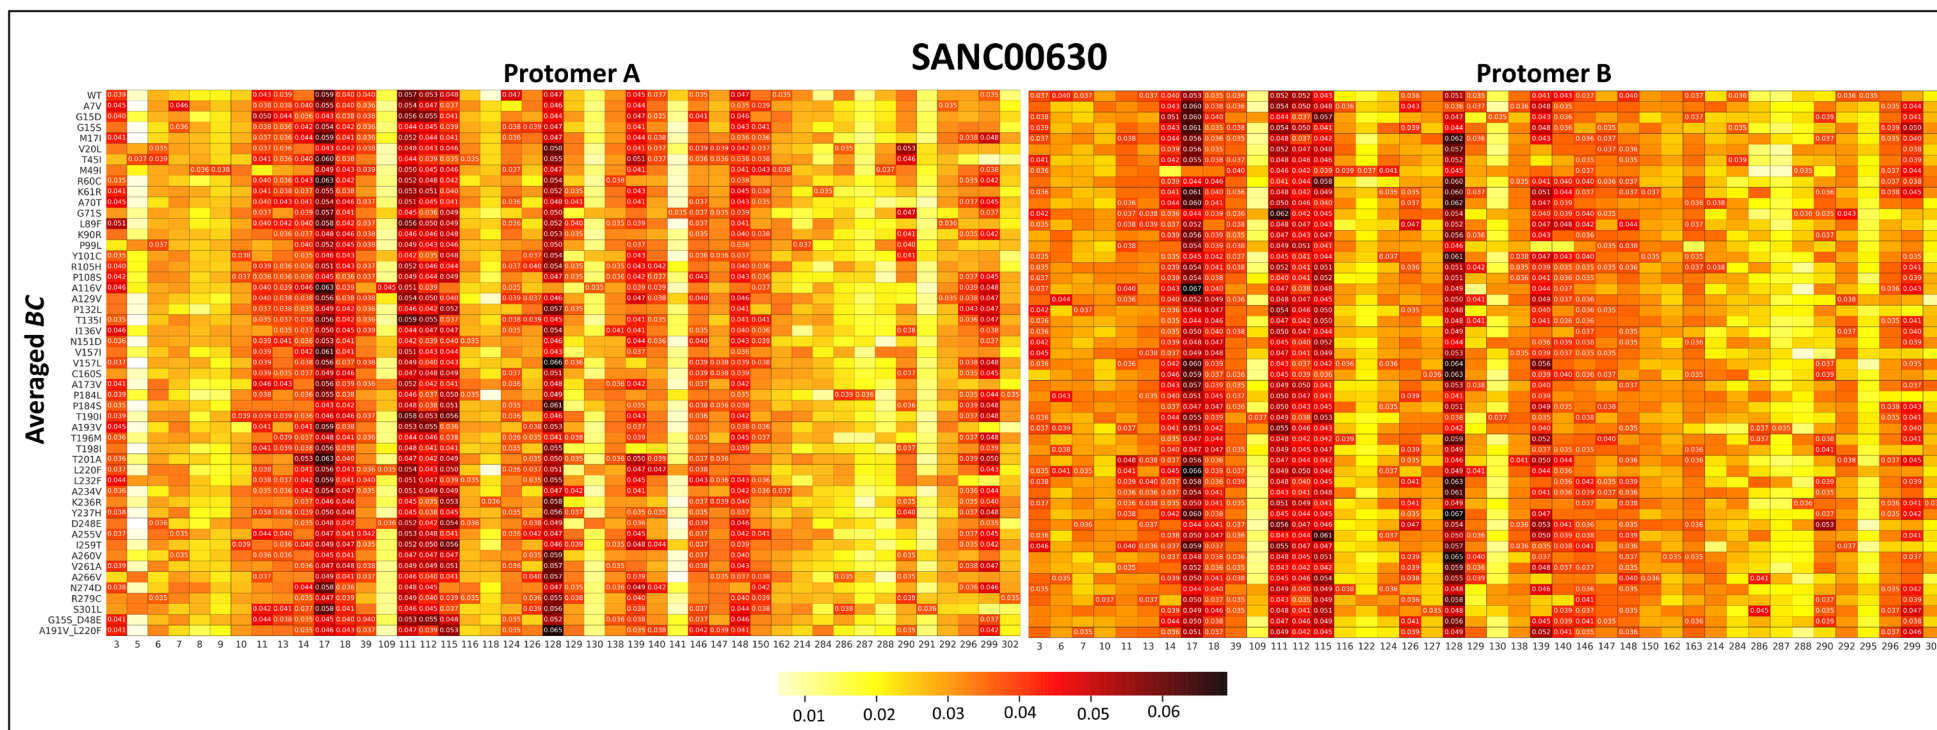

**Figure S2F.** Heatmaps of the potential hubs as per to the global top 5% of the *BC* DRN metric for the reference (WT) and mutant systems in complex with allosteric modulator: SANCO0630. *BC* measurements of ligand-bound protomer (chain A) are shown on the left while those of the unbound protomer B are on the right. Residue hubs are annotated with their centrality values, while their homologous residues in alternate samples are not. The colour scale from white, through yellow, orange and red to black indicates the degree of residue centrality.

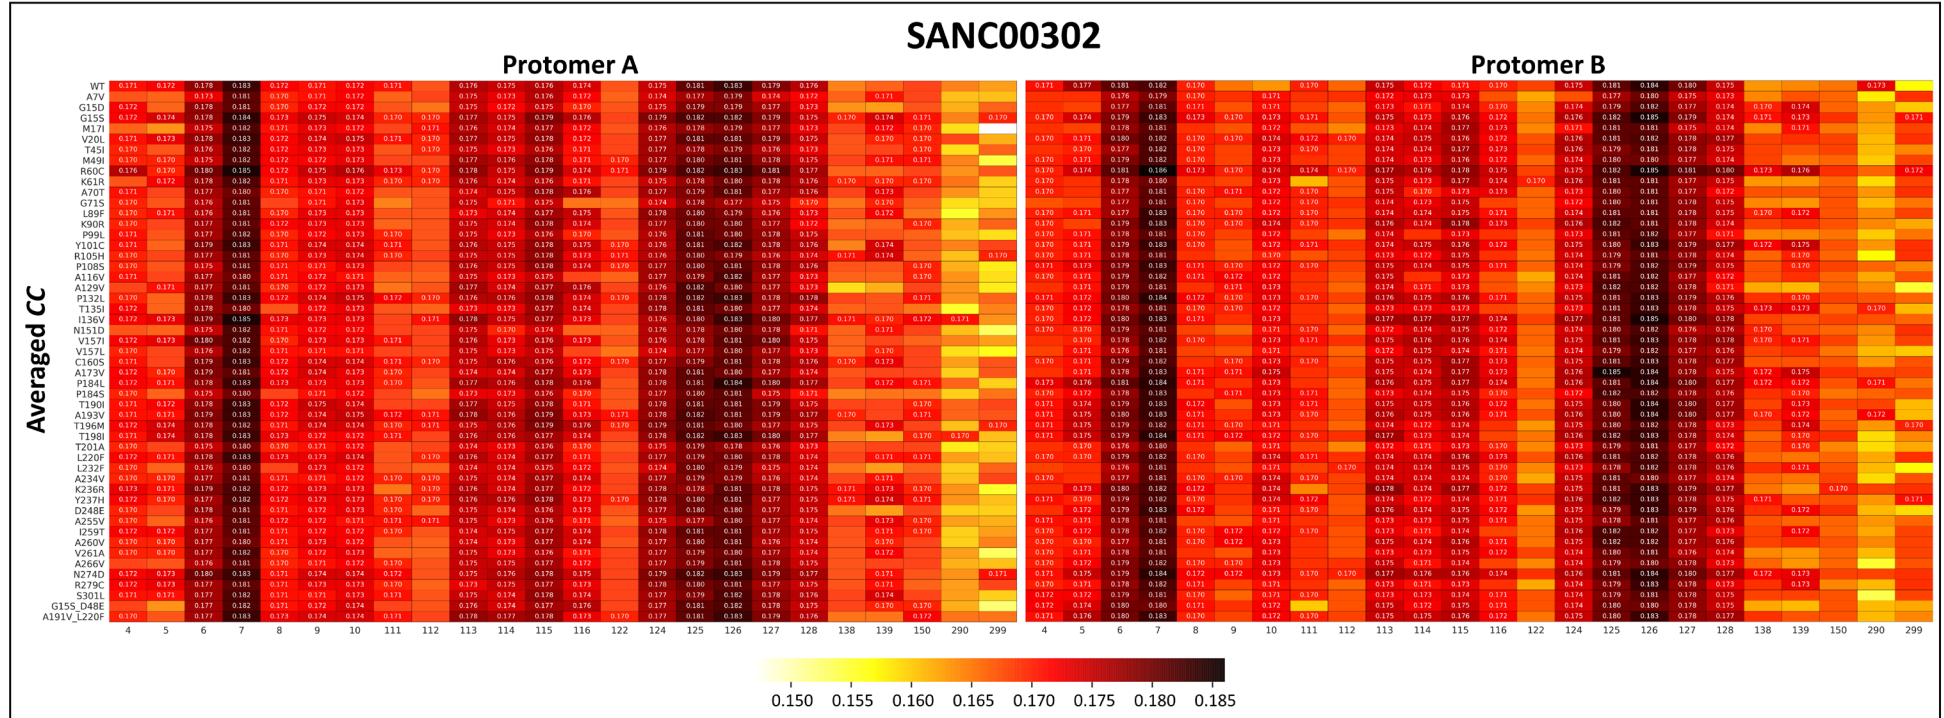

**Figure S3A.** Heatmaps of the potential hubs as per to the global top 5% of the *CC* DRN metric for the reference (WT) and mutant systems in complex with allosteric modulator: SANC00302. *CC* measurements of ligand-bound protomer (chain A) are shown on the left while those of the unbound protomer B are on the right. Residue hubs are annotated with their centrality values, while their homologous residues in alternate samples are not. The color scale from white, through yellow, orange and red to black indicates the degree of residue centrality.

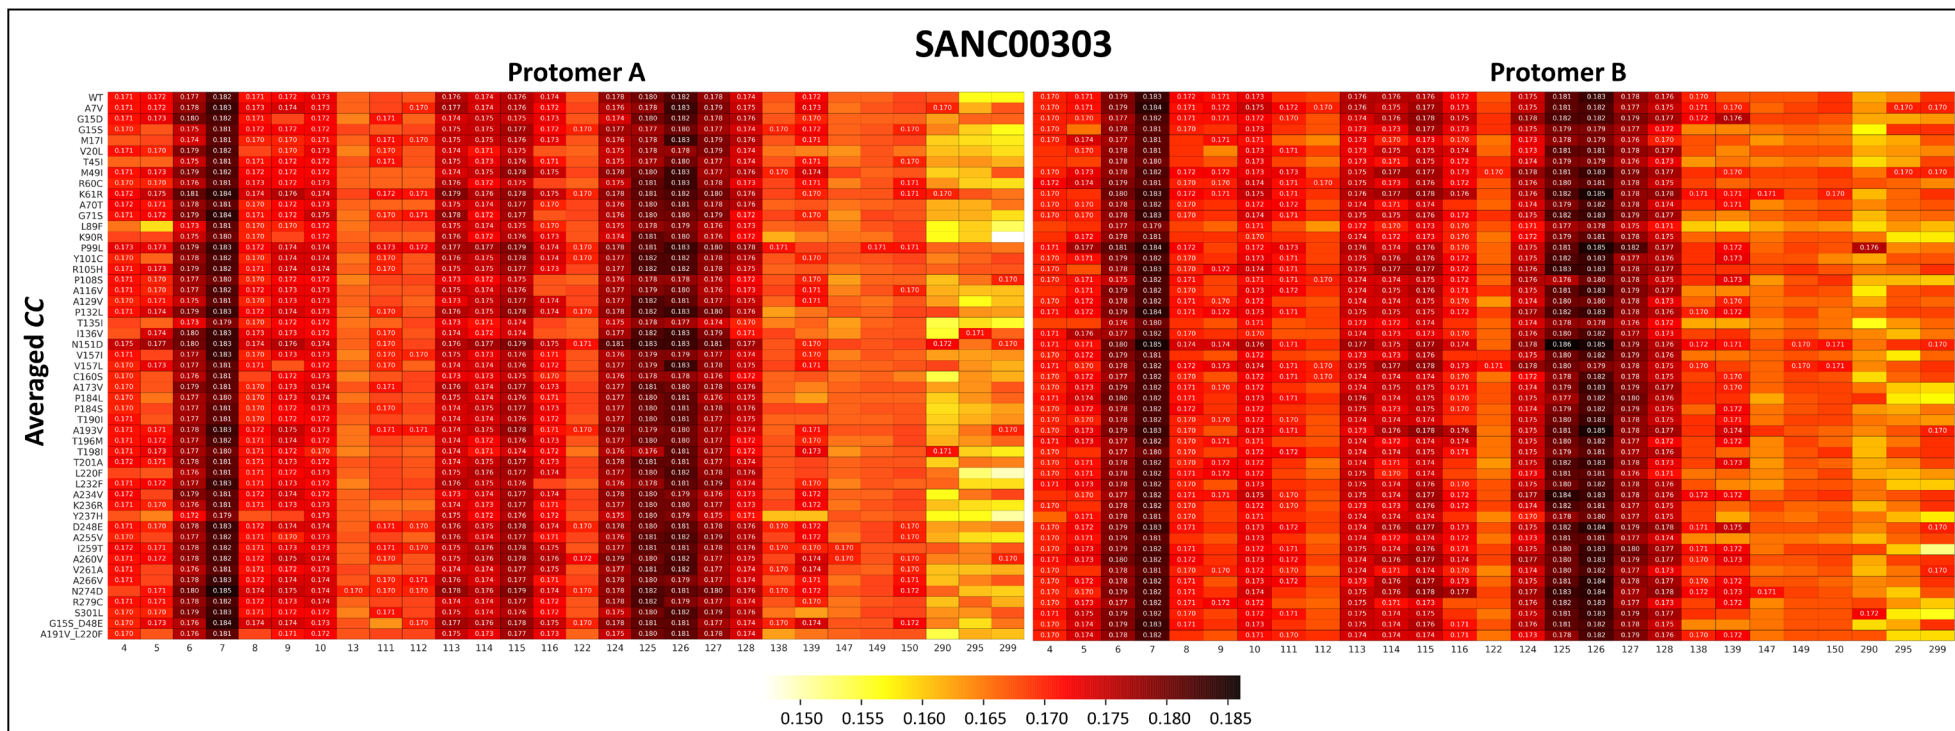

**Figure S3B.** Heatmaps of the potential hubs as per to the global top 5% of the CC DRN metric for the reference (WT) and mutant systems in complex with allosteric modulator: SANC00303. CC measurements of ligand-bound protomer (chain A) are shown on the left while those of the unbound protomer B are on the right. Residue hubs are annotated with their centrality values, while their homologous residues in alternate samples are not. The colour scale from white, through yellow, orange and red to black indicates the degree of residue centrality.

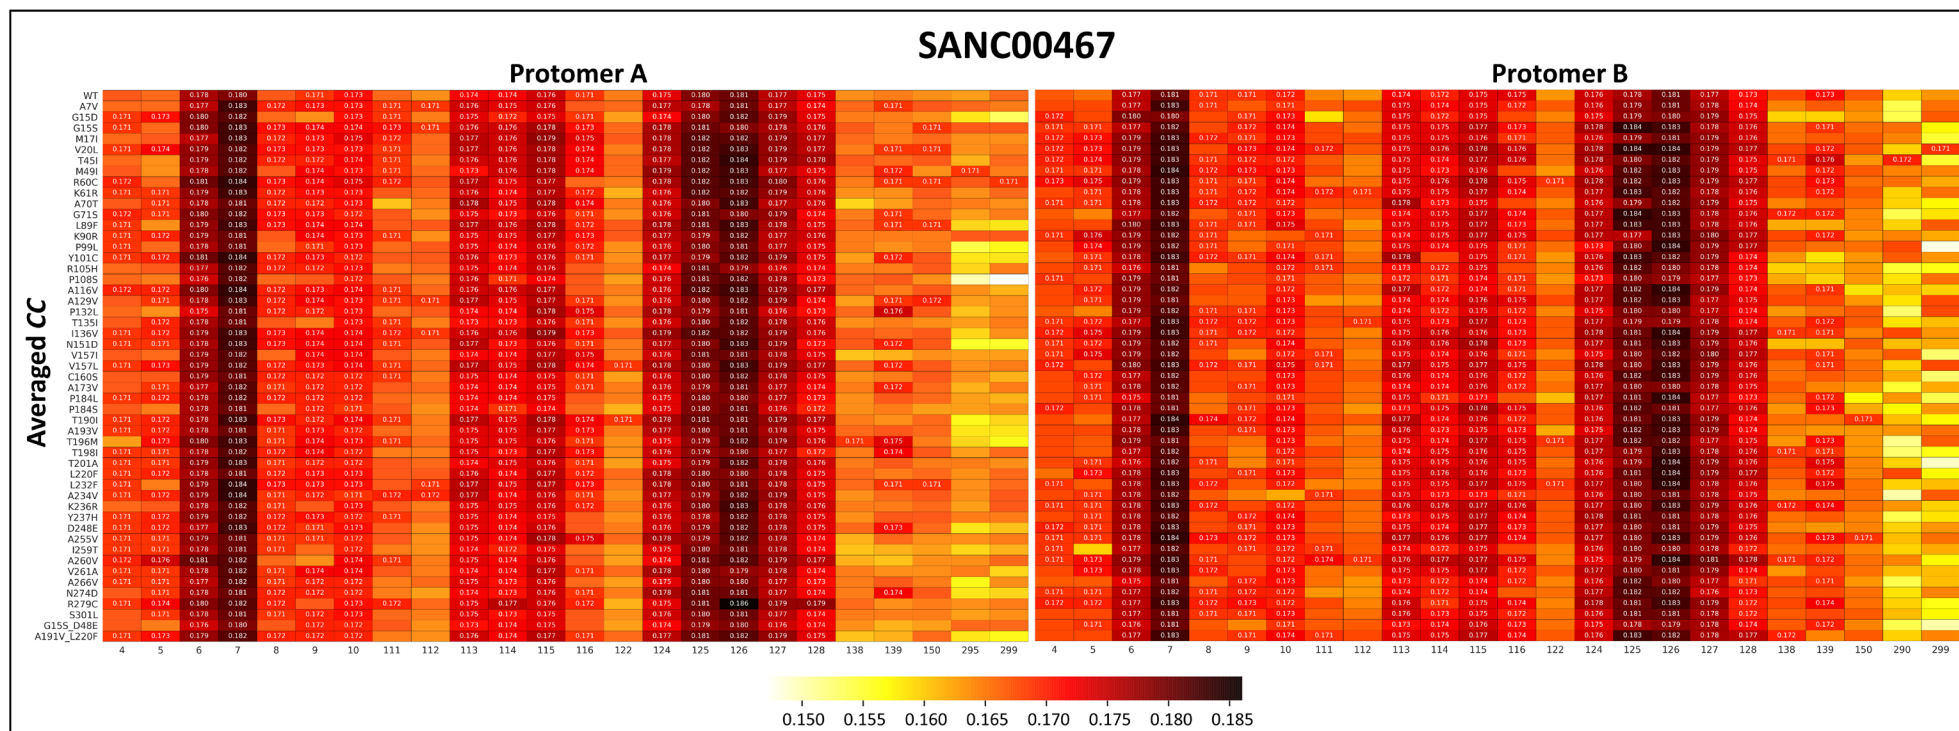

**Figure S3C.** Heatmaps of the potential hubs as per to the global top 5% of the CC DRN metric for the reference (WT) and mutant systems in complex with allosteric modulator: SANC00467. CC measurements of ligand-bound protomer (chain A) are shown on the left while those of the unbound protomer B are on the right. Residue hubs are annotated with their centrality values, while their homologous residues in alternate samples are not. The colour scale from white, through yellow, orange and red to black indicates the degree of residue centrality.

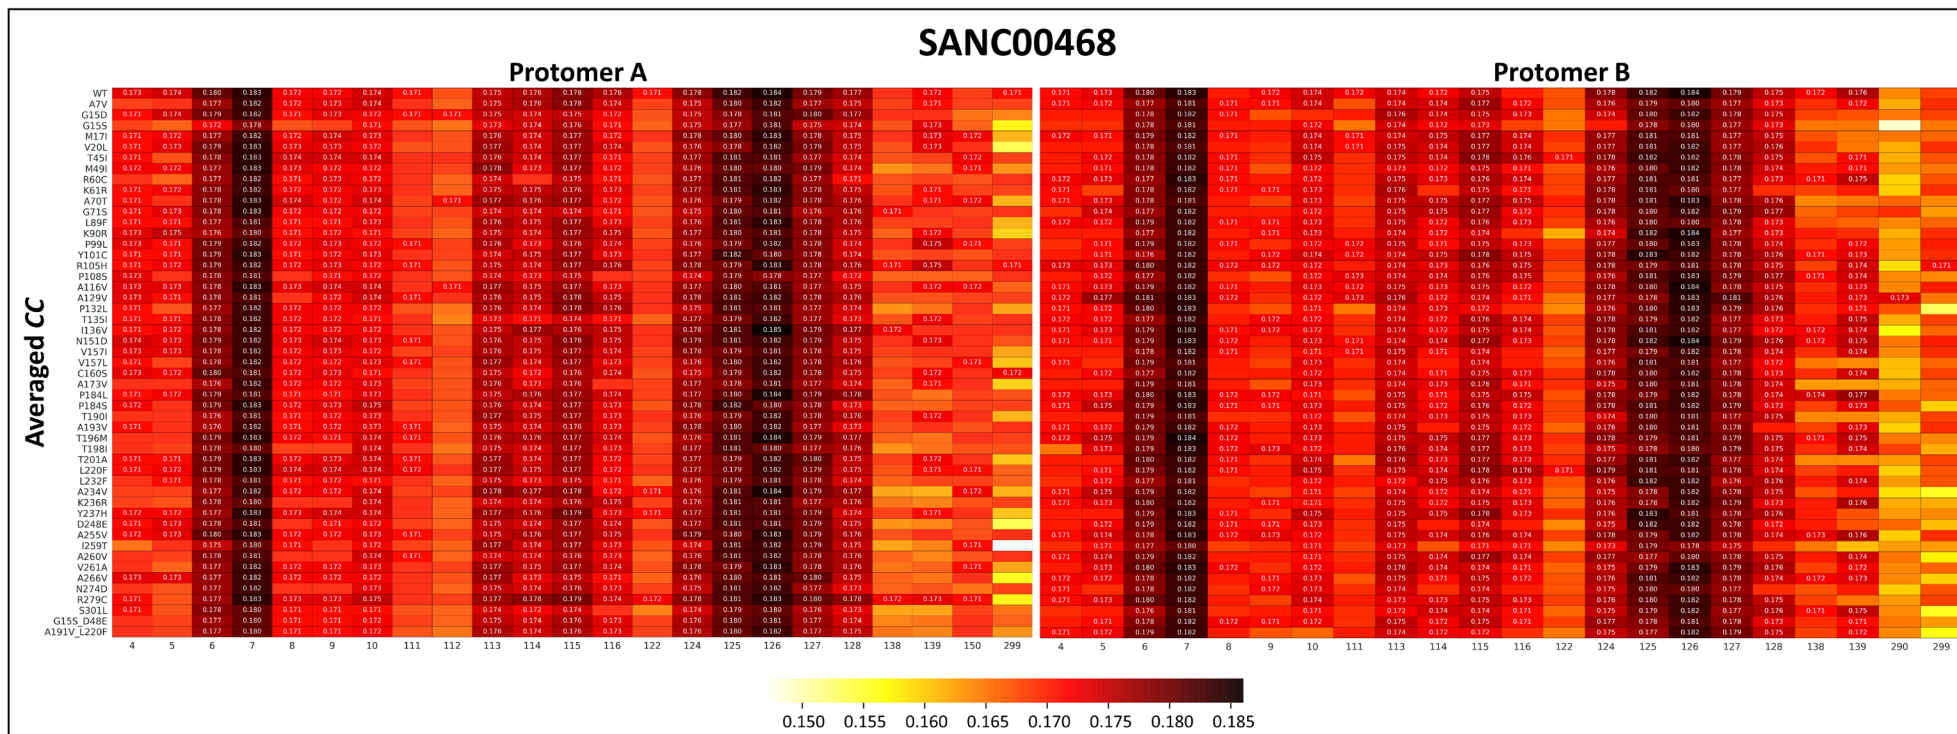

**Figure S3D.** Heatmaps of the potential hubs as per to the global top 5% of the CC DRN metric for the reference (WT) and mutant systems in complex with allosteric modulator: SANC00468. CC measurements of ligand-bound protomer (chain A) are shown on the left while those of the unbound protomer B are on the right. Residue hubs are annotated with their centrality values, while their homologous residues in alternate samples are not. The colour scale from white, through yellow, orange and red to black indicates the degree of residue centrality.

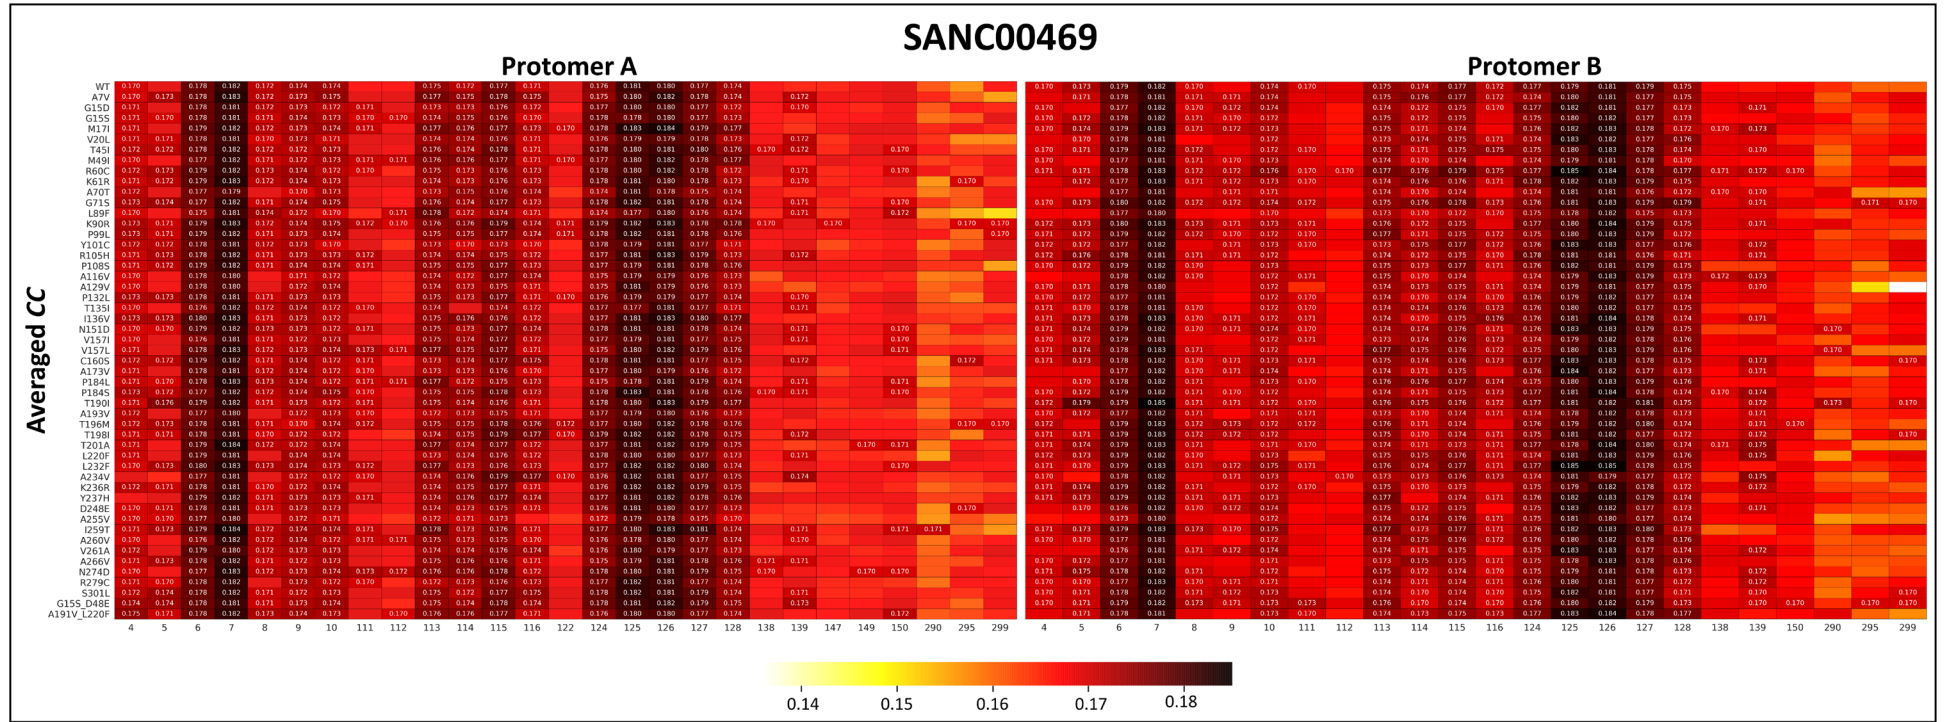

**Figure S3E.** Heatmaps of the potential hubs as per to the global top 5% of the *CC* DRN metric for the reference (WT) and mutant systems in complex with allosteric modulator: SANC00469. *CC* measurements of ligand-bound protomer (chain A) are shown on the left while those of the unbound protomer B are on the right. Residue hubs are annotated with their centrality values, while their homologous residues in alternate samples are not. The colour scale from white, through yellow, orange and red to black indicates the degree of residue centrality.



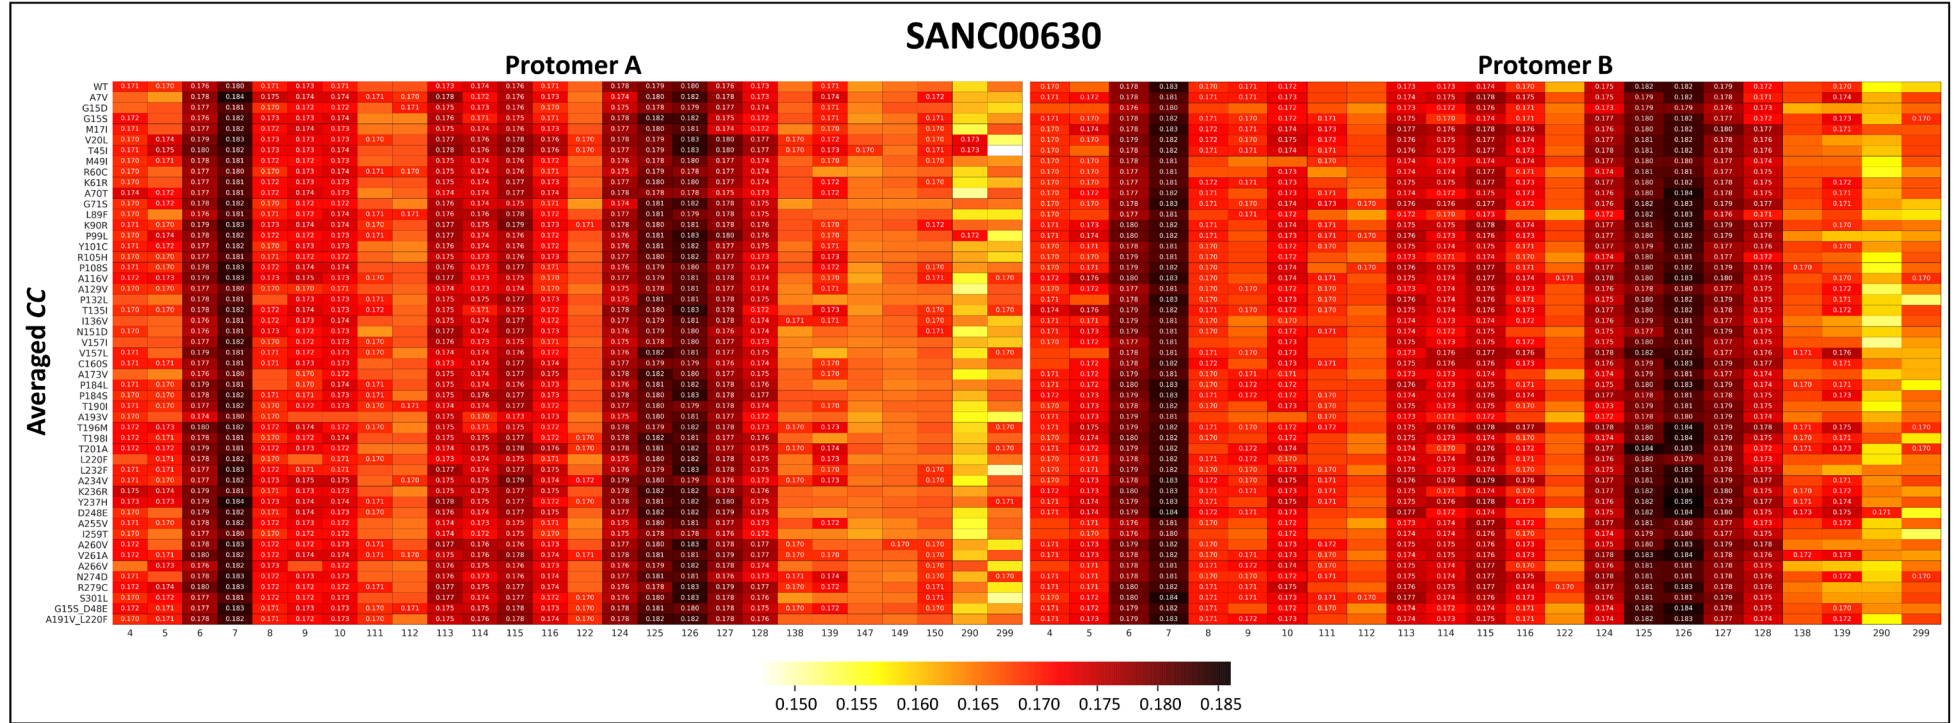

**Figure S3F.** Heatmaps of the potential hubs as per to the global top 5% of the *CC* DRN metric for the reference (WT) and mutant systems in complex with allosteric modulator: SANC00630. *CC* measurements of ligand-bound protomer (chain A) are shown on the left while those of the unbound protomer B are on the right. Residue hubs are annotated with their centrality values, while their homologous residues in alternate samples are not. The colour scale from white, through yellow, orange and red to black indicates the degree of residue centrality.

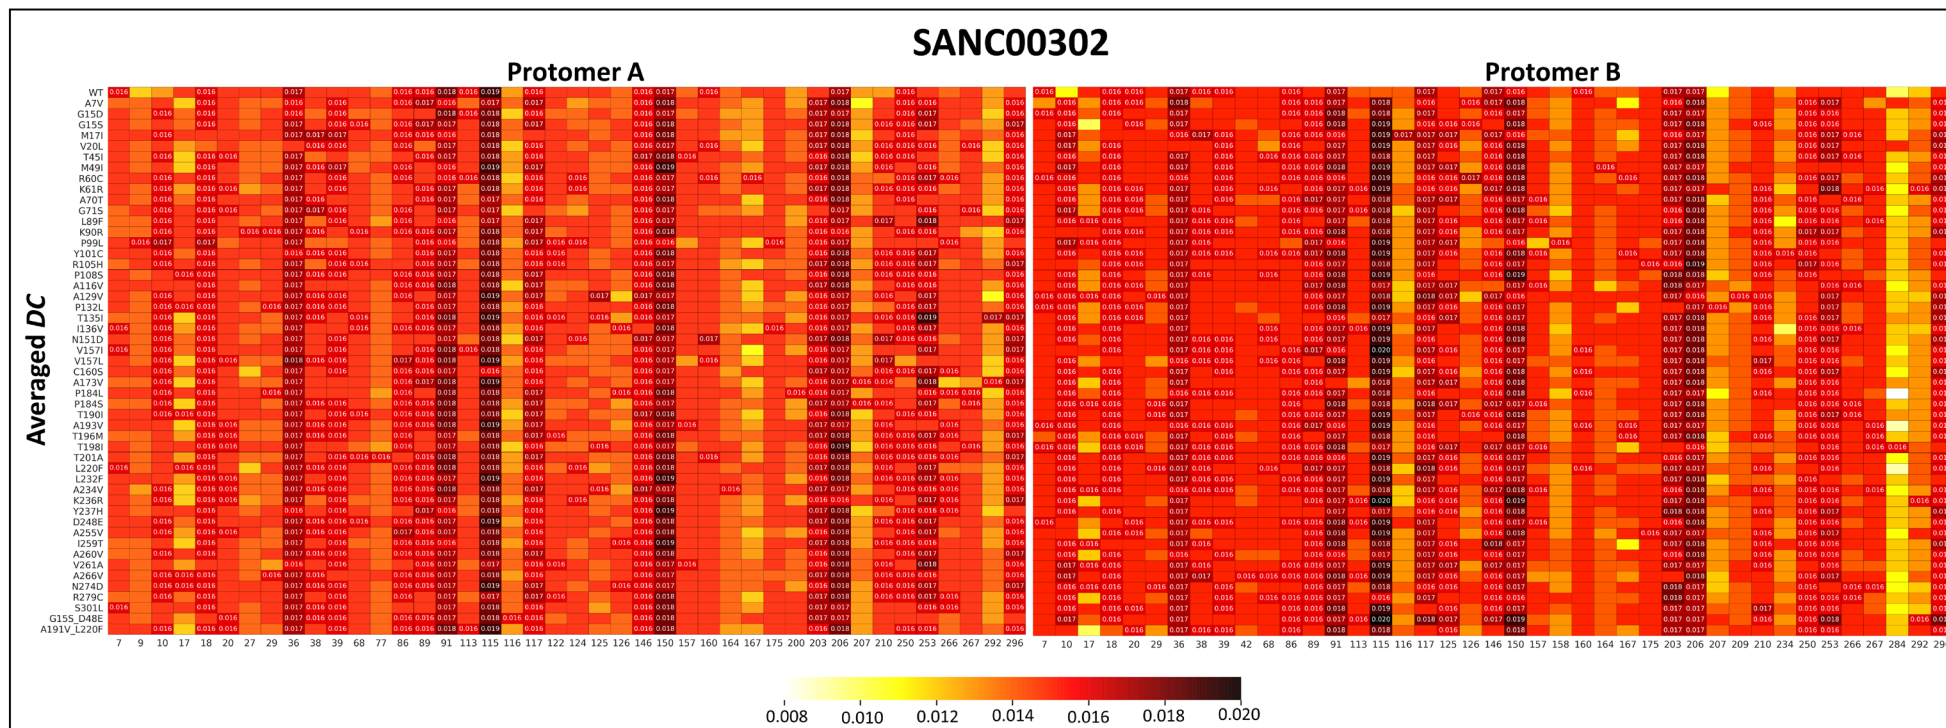

**Figure S4A.** Heatmaps of the potential hubs as per to the global top 5% of the *DC* DRN metric for the reference (WT) and mutant systems in complex with allosteric modulator: SANC00302. *DC* measurements of ligand-bound protomer (chain A) are shown on the left while those of the unbound protomer B are on the right. Residue hubs are annotated with their centrality values, while their homologous residues in alternate samples are not. The colour scale from white, through yellow, orange and red to black indicates the degree of residue centrality.

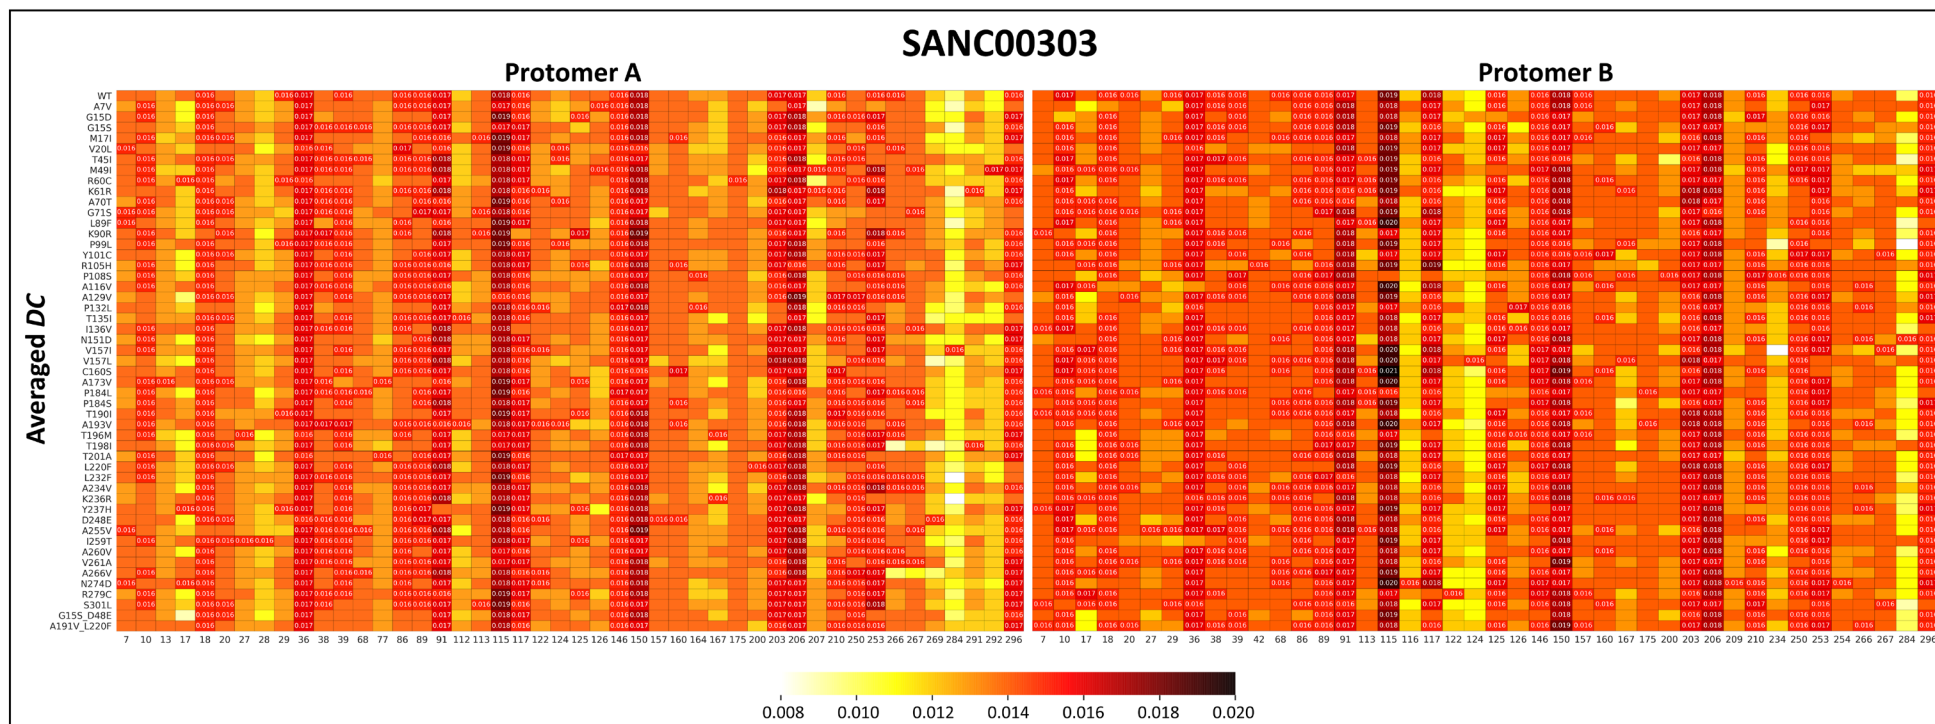

**Figure S4B.** Heatmaps of the potential hubs as per to the global top 5% of the *DC* DRN metric for the reference (WT) and mutant systems in complex with allosteric modulator: SANC00303. *DC* measurements of ligand-bound protomer (chain A) are shown on the left while those of the unbound protomer B are on the right. Residue hubs are annotated with their centrality values, while their homologous residues in alternate samples are not. The colour scale from white, through yellow, orange and red to black indicates the degree of residue centrality.

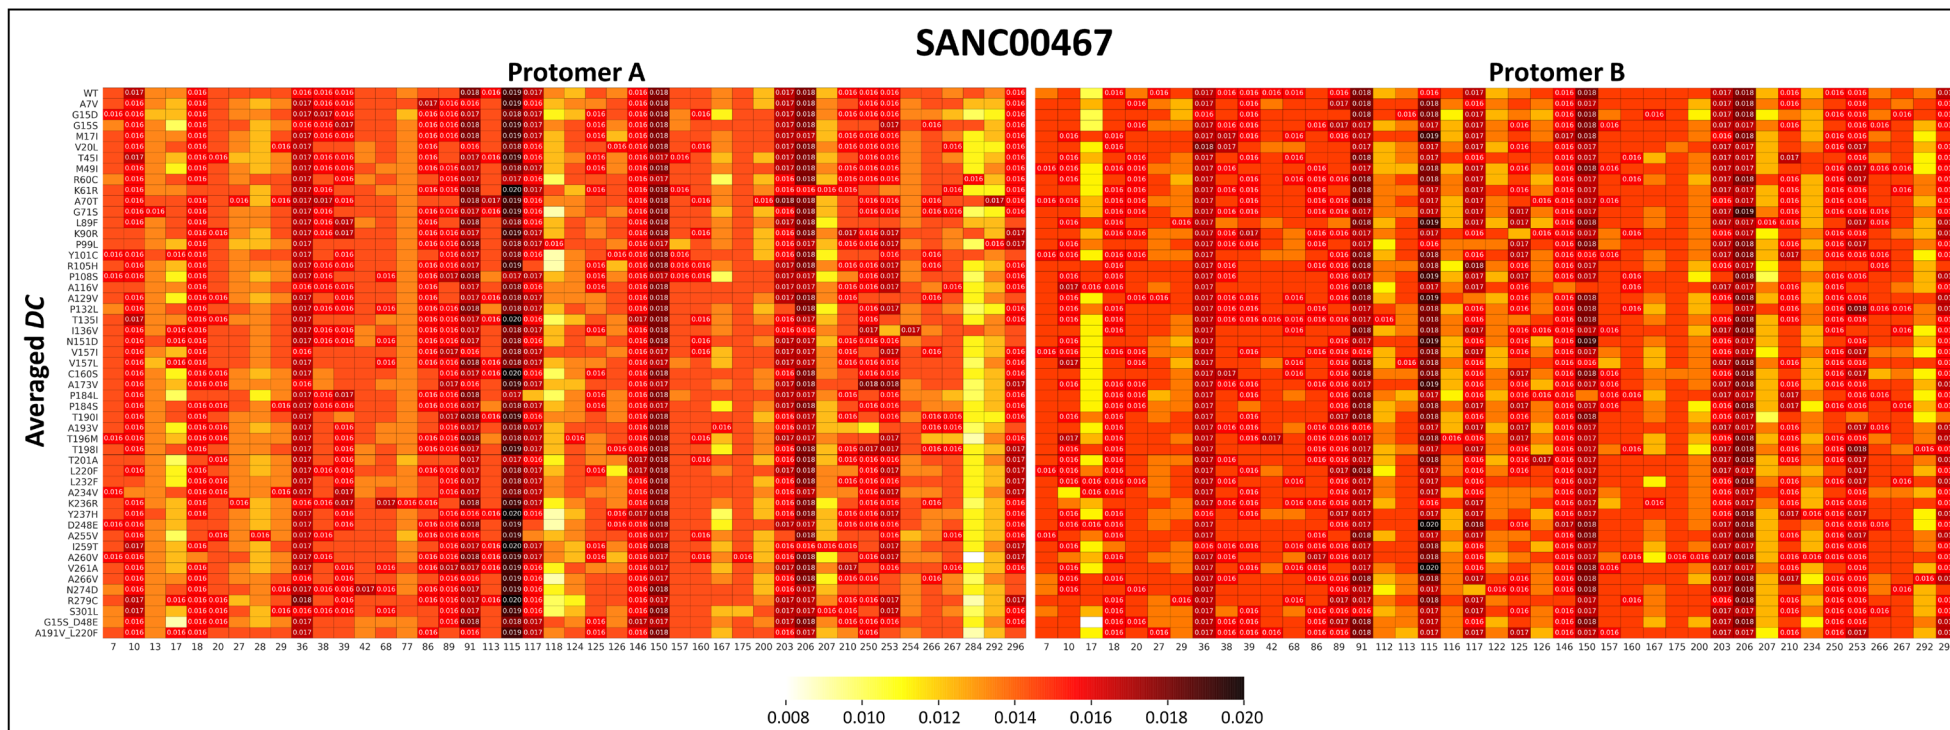

**Figure S4C.** Heatmaps of the potential hubs as per to the global top 5% of the *DC* DRN metric for the reference (WT) and mutant systems in complex with allosteric modulator: SANC00467. *DC* measurements of ligand-bound protomer (chain A) are shown on the left while those of the unbound protomer B are on the right. Residue hubs are annotated with their centrality values, while their homologous residues in alternate samples are not. The colour scale from white, through yellow, orange and red to black indicates the degree of residue centrality.

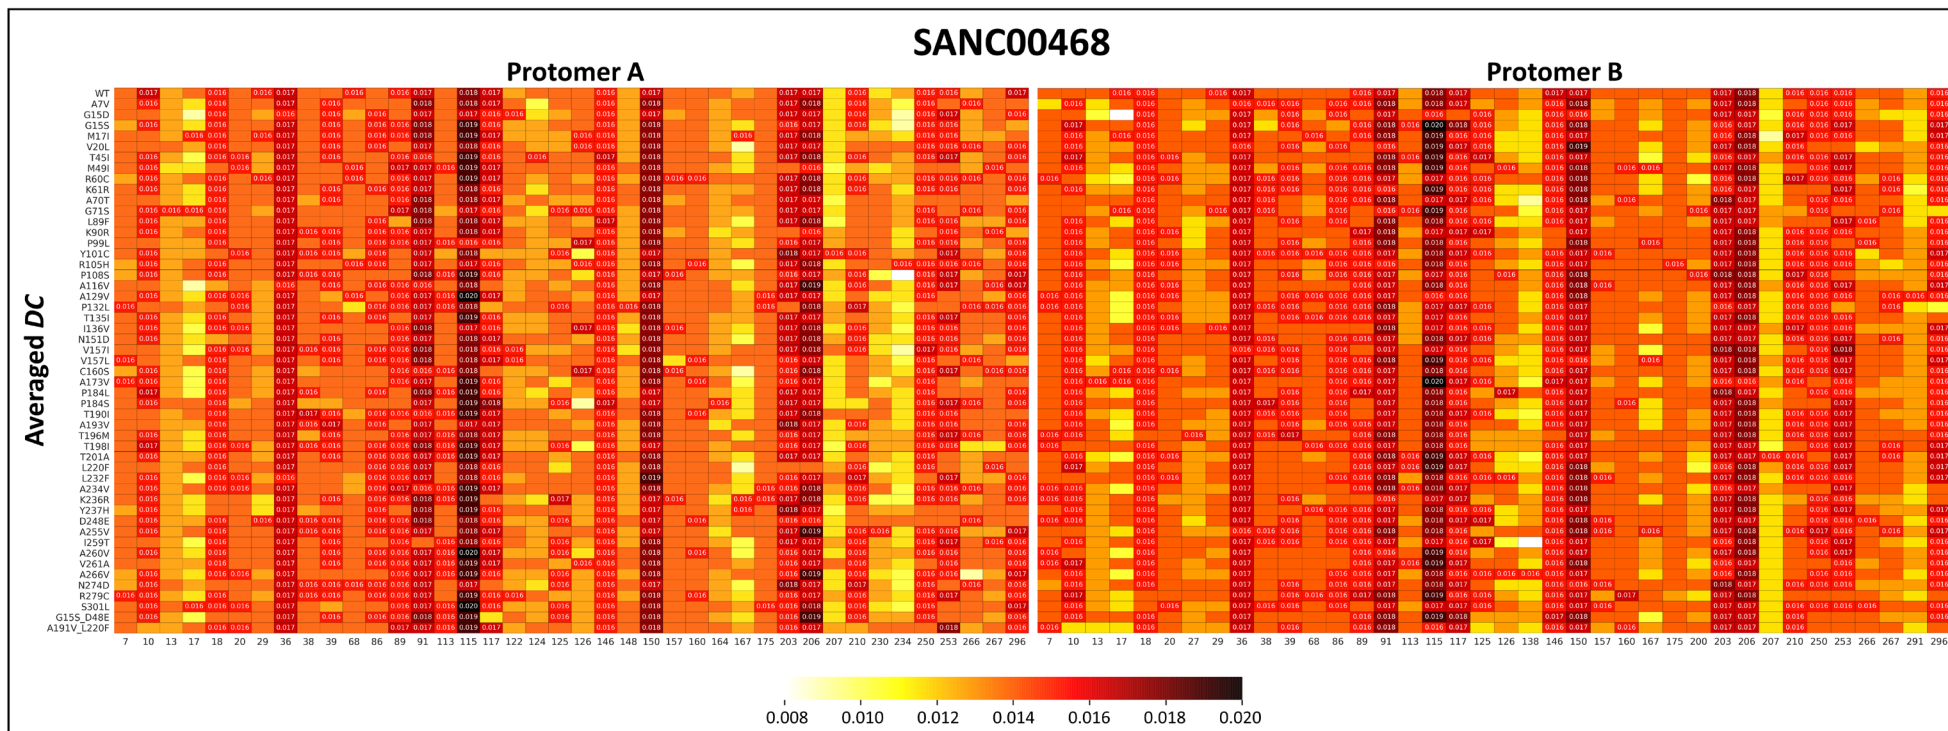

**Figure S4D.** Heatmaps of the potential hubs as per to the global top 5% of the *DC* DRN metric for the reference (WT) and mutant systems in complex with allosteric modulator: SANC00468. *DC* measurements of ligand-bound protomer (chain A) are shown on the left while those of the unbound protomer B are on the right. Residue hubs are annotated with their centrality values, while their homologous residues in alternate samples are not. The colour scale from white, through yellow, orange and red to black indicates the degree of residue centrality.

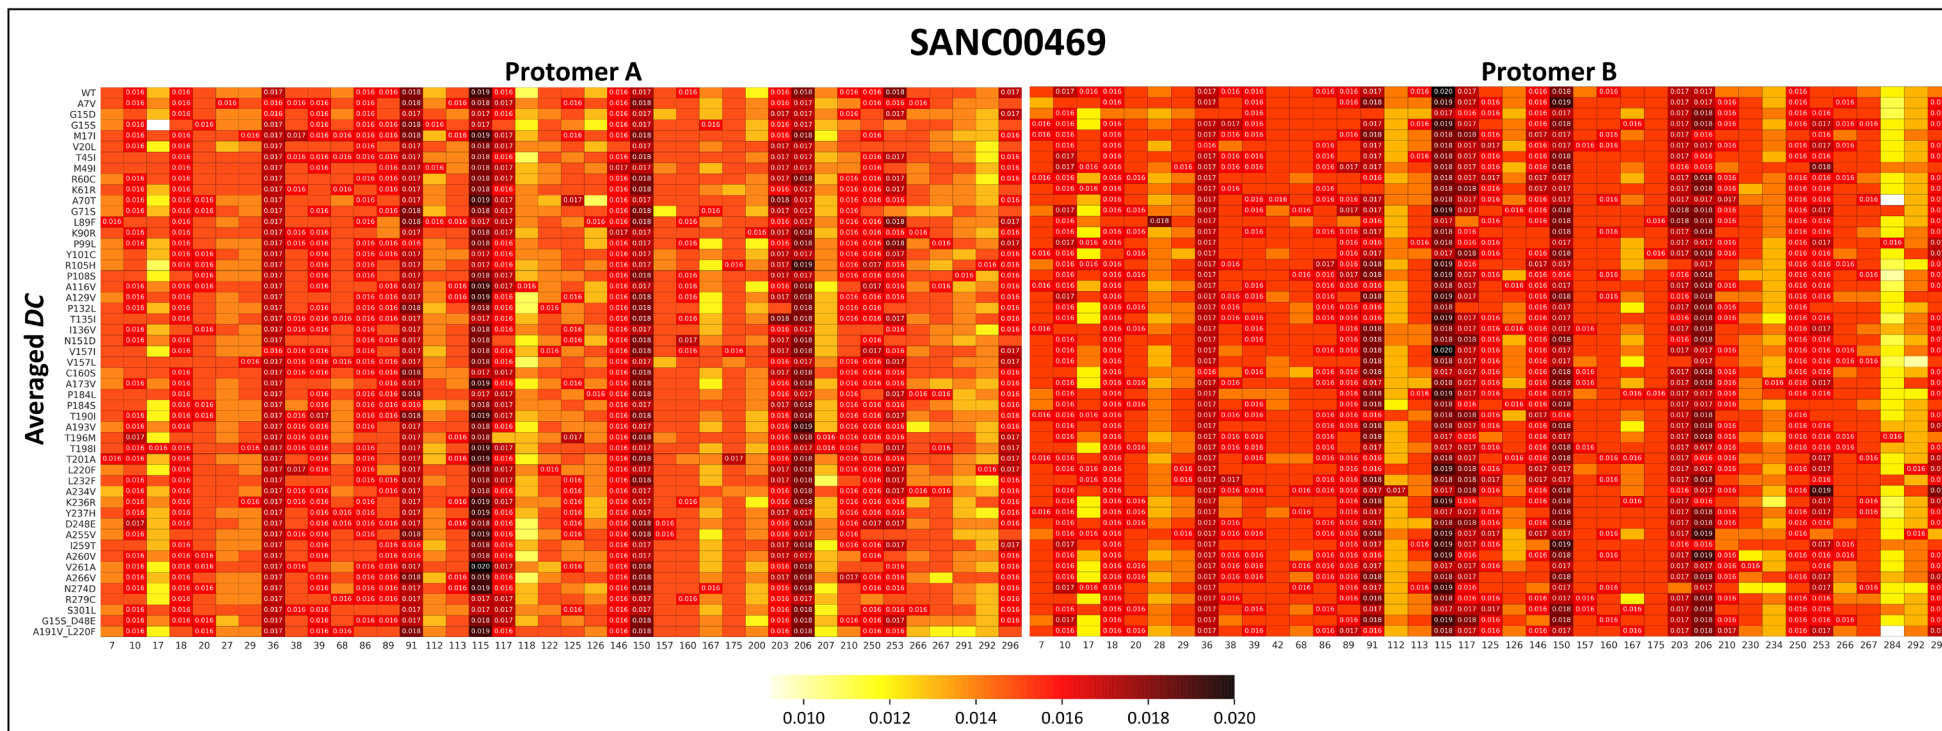

**Figure S4E.** Heatmaps of the potential hubs as per to the global top 5% of the *DC* DRN metric for the reference (WT) and mutant systems in complex with allosteric modulator: SANC00469. *DC* measurements of ligand-bound protomer (chain A) are shown on the left while those of the unbound protomer B are on the right. Residue hubs are annotated with their centrality values, while their homologous residues in alternate samples are not. The colour scale from white, through yellow, orange and red to black indicates the degree of residue centrality.

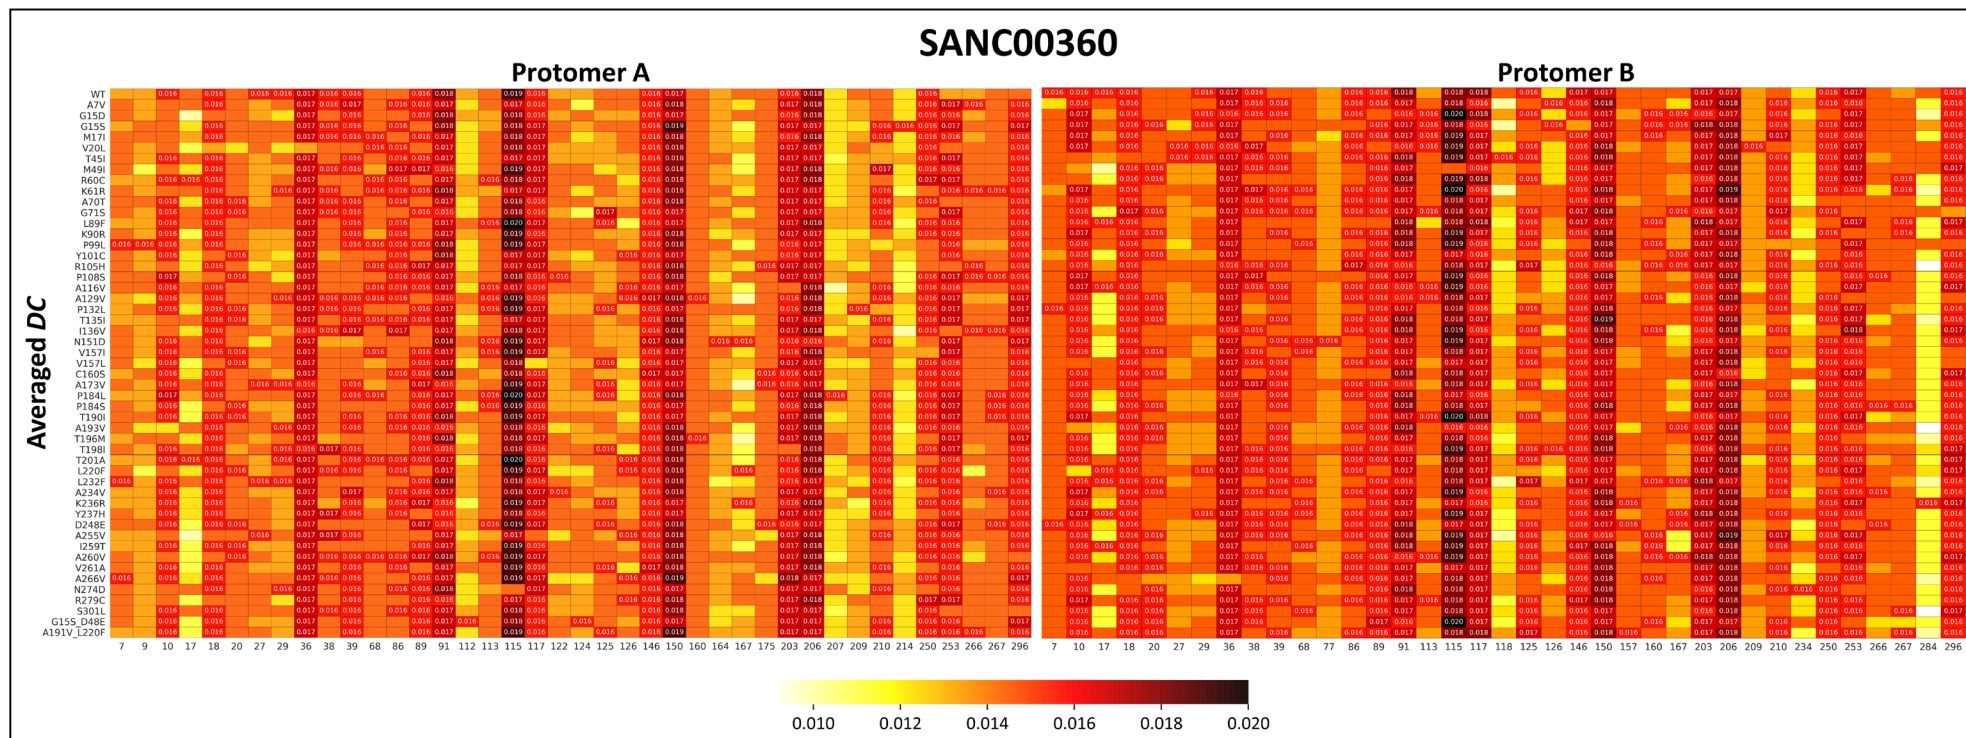

**Figure S4F.** Heatmaps of the potential hubs as per to the global top 5% of the *DC* DRN metric for the reference (WT) and mutant systems in complex with allosteric modulator: SANC00630. *DC* measurements of ligand-bound protomer (chain A) are shown on the left while those of the unbound protomer B are on the right. Residue hubs are annotated with their centrality values, while their homologous residues in alternate samples are not. The colour scale from white, through yellow, orange and red to black indicates the degree of residue centrality.

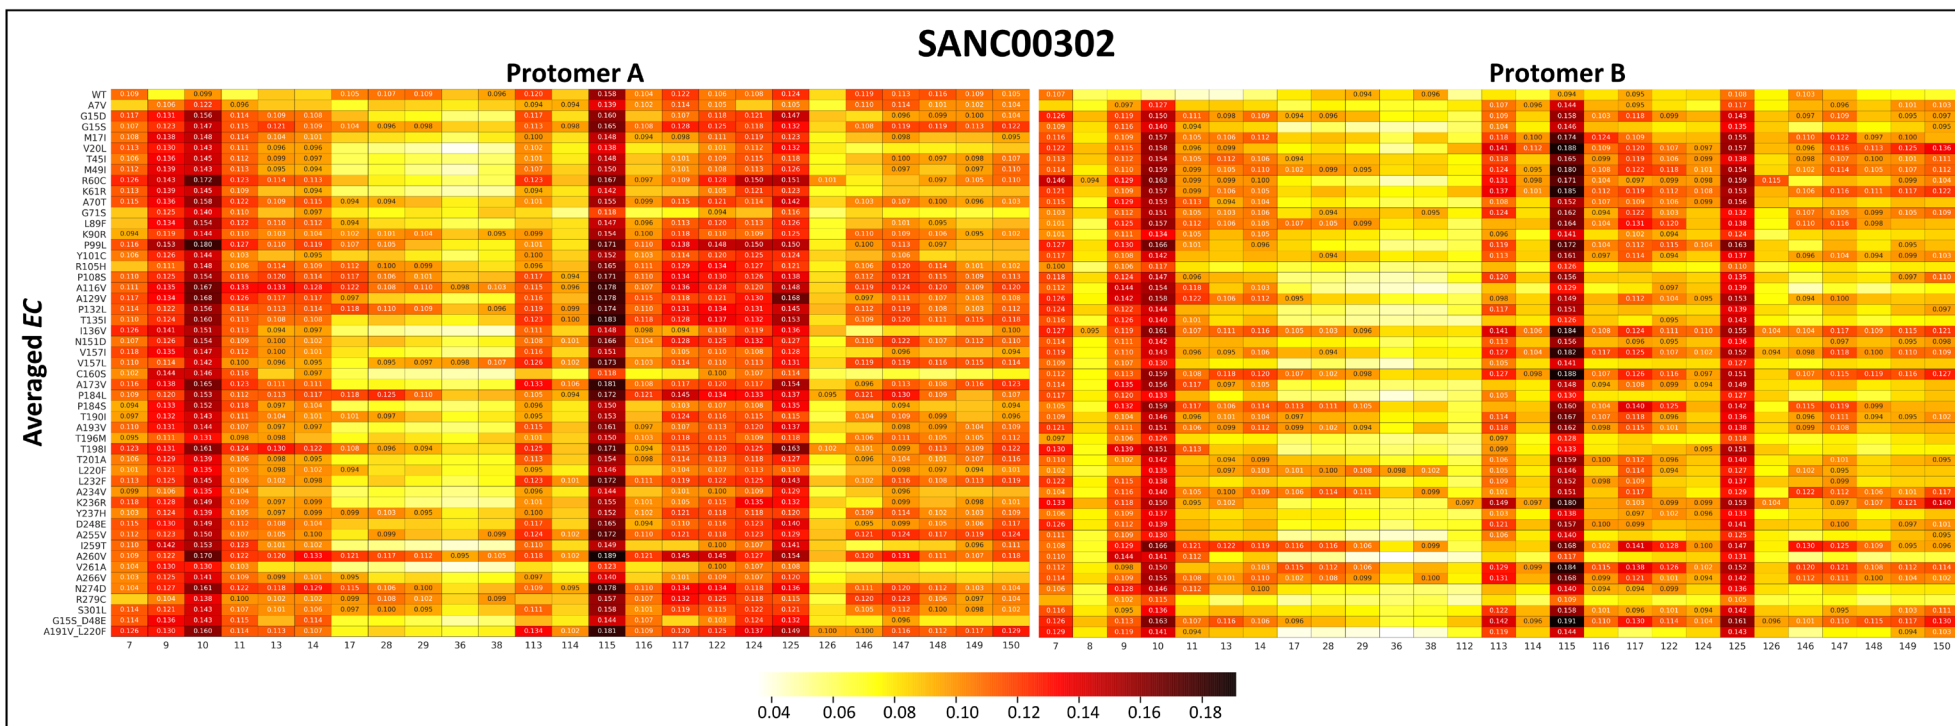

**Figure S5A.** Heatmaps of the potential hubs as per to the global top 5% of the *EC* DRN metric for the reference (WT) and mutant systems in complex with allosteric modulator: SANC00302. *EC* measurements of ligand-bound protomer (chain A) are shown on the left while those of the unbound protomer B are on the right. Residue hubs are annotated with their centrality values, while their homologous residues in alternate samples are not. The colour scale from white, through yellow, orange and red to black indicates the degree of residue centrality.



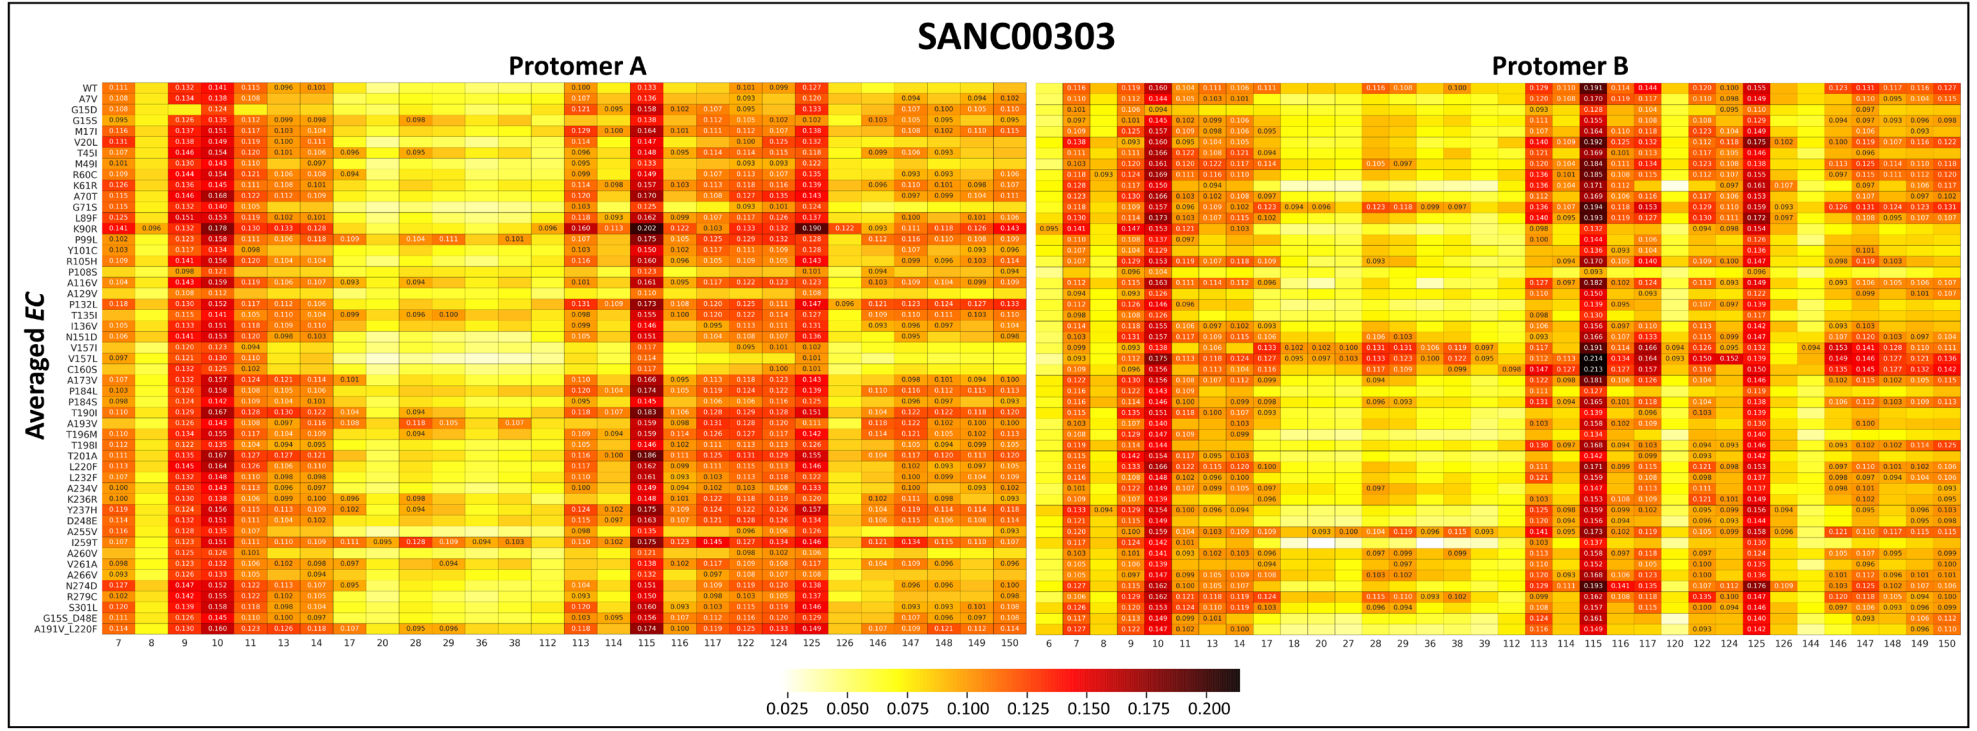

**Figure S5B.** Heatmaps of the potential hubs as per to the global top 5% of the *EC* DRN metric for the reference (WT) and mutant systems in complex with allosteric modulator: SANC00303. *EC* measurements of ligand-bound protomer (chain A) are shown on the left while those of the unbound protomer B are on the right. Residue hubs are annotated with their centrality values, while their homologous residues in alternate samples are not. The colour scale from white, through yellow, orange and red to black indicates the degree of residue centrality.

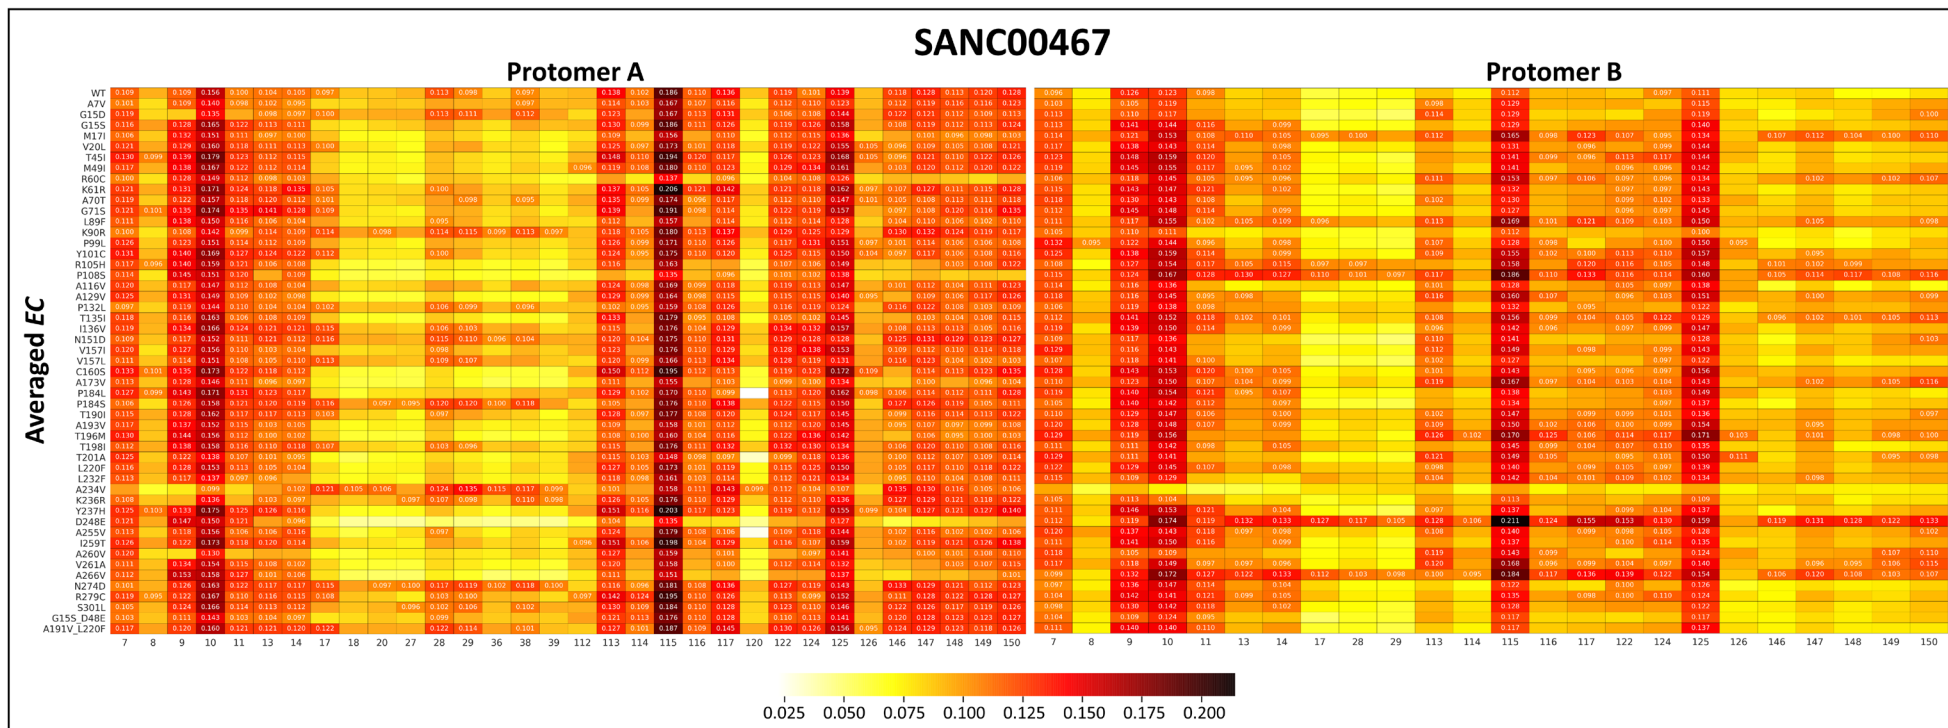

**Figure S5C.** Heatmaps of the potential hubs as per to the global top 5% of the *EC* DRN metric for the reference (WT) and mutant systems in complex with allosteric modulator: SANC00467. *EC* measurements of ligand-bound protomer (chain A) are shown on the left while those of the unbound protomer B are on the right. Residue hubs are annotated with their centrality values, while their homologous residues in alternate samples are not. The colour scale from white, through yellow, orange and red to black indicates the degree of residue centrality.

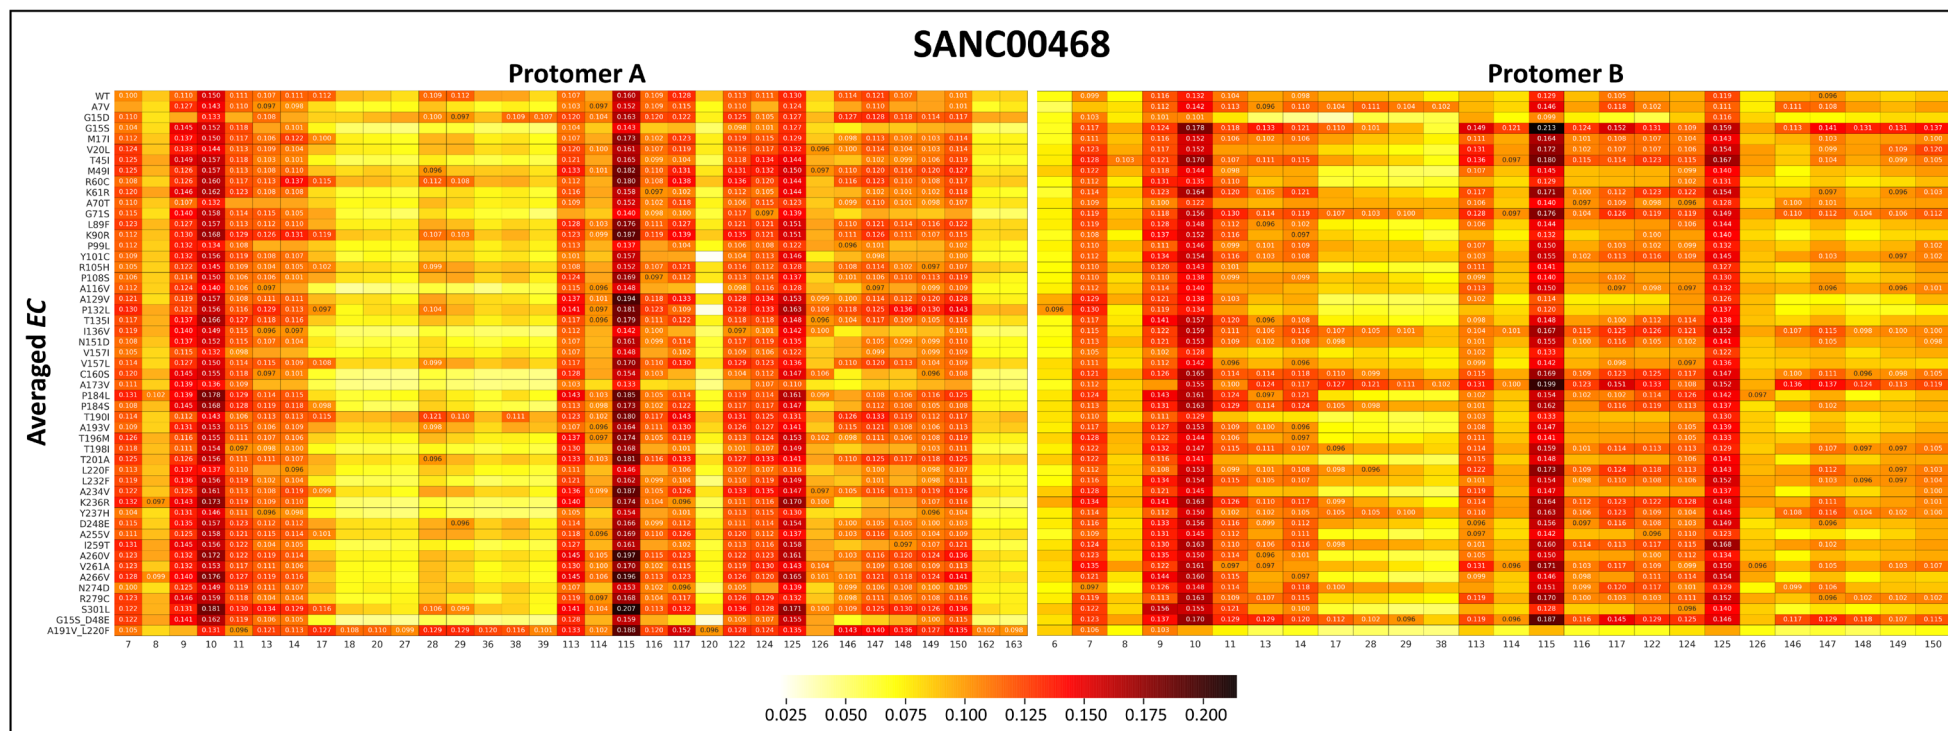

**Figure S5D.** Heatmaps of the potential hubs as per to the global top 5% of the *EC* DRN metric for the reference (WT) and mutant systems in complex with allosteric modulator: SANCO0468. *EC* measurements of ligand-bound protomer (chain A) are shown on the left while those of the unbound protomer B are on the right. Residue hubs are annotated with their centrality values, while their homologous residues in alternate samples are not. The colour scale from white, through yellow, orange and red to black indicates the degree of residue centrality.

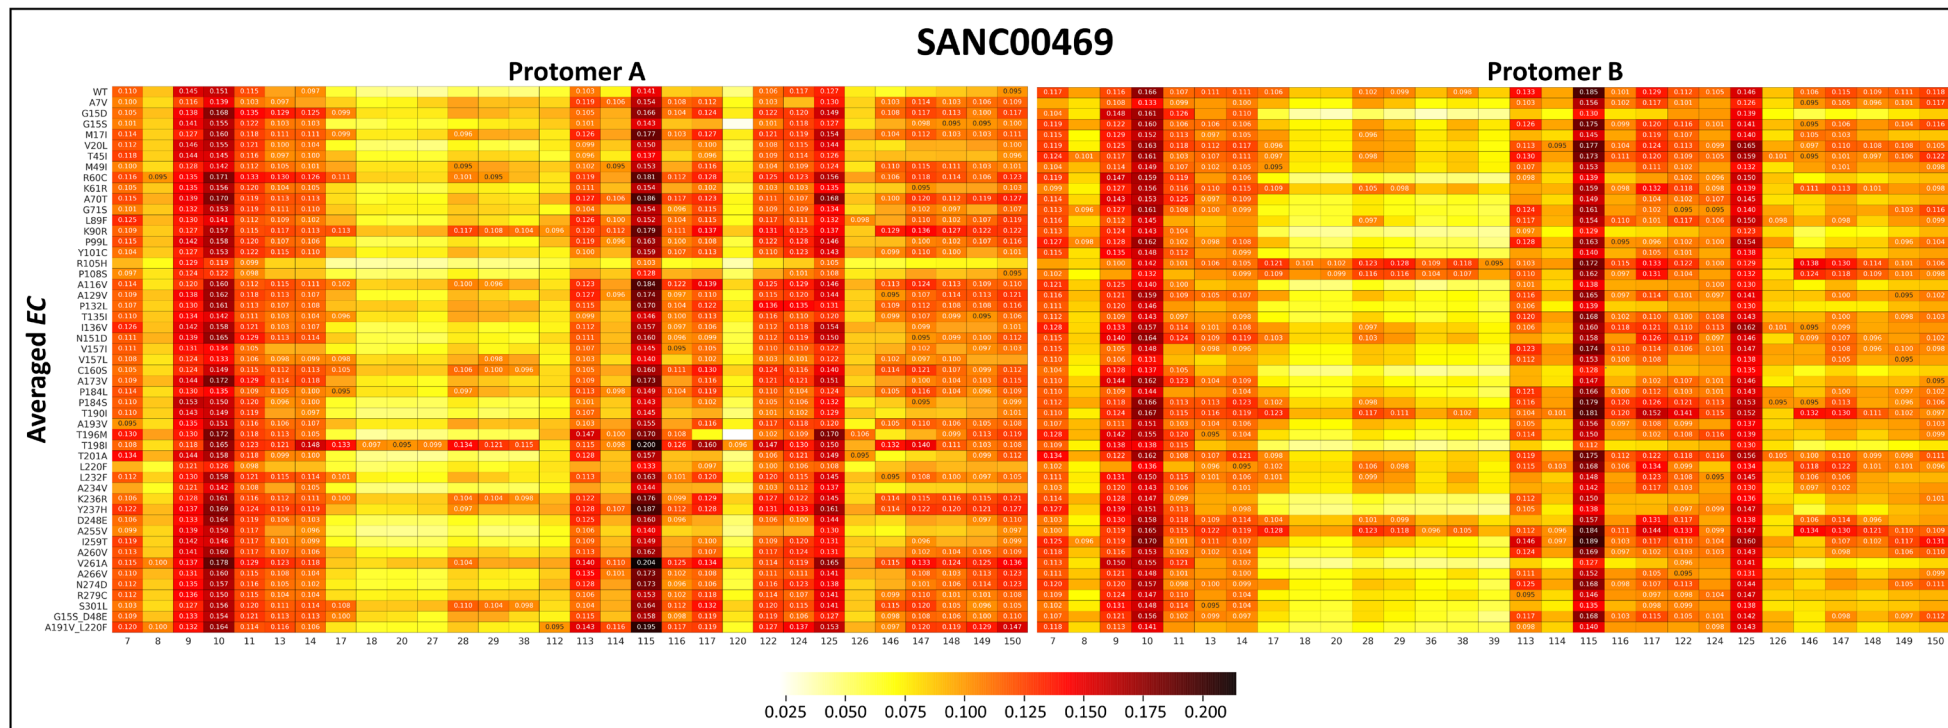

**Figure S5E.** Heatmaps of the potential hubs as per to the global top 5% of the *EC* DRN metric for the reference (WT) and mutant samples in complex with allosteric modulator: SANC00469. *EC* measurements of ligand-bound protomer (chain A) are shown on the left while those of the unbound protomer B are on the right. Residue hubs are annotated with their centrality values, while their homologous residues in alternate samples are not. The colour scale from white, through yellow, orange and red to black indicates the degree of residue centrality.

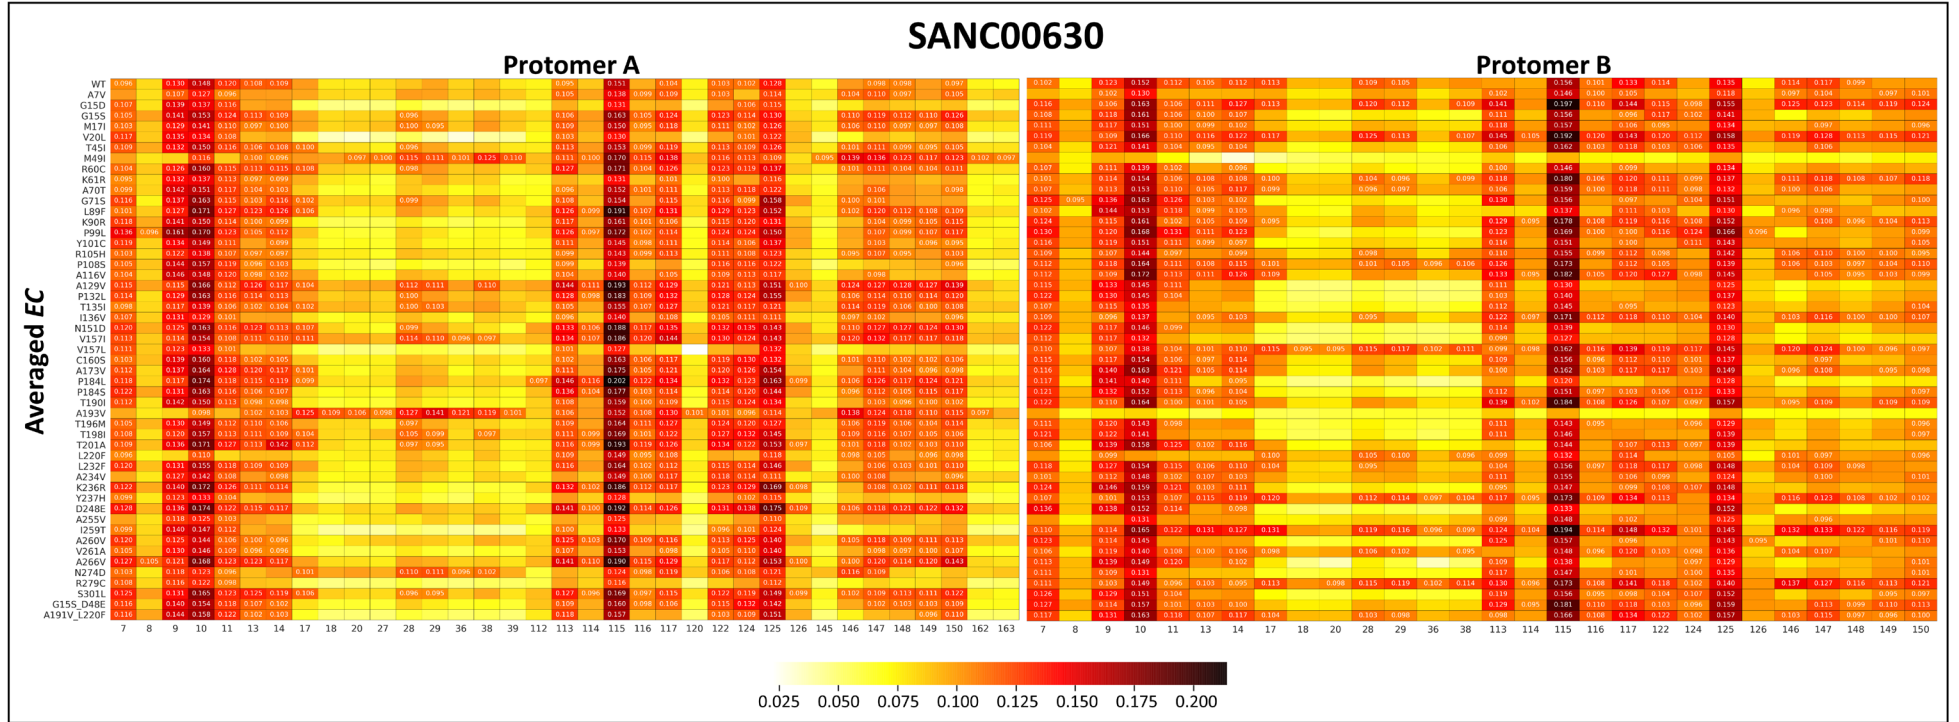

**Figure S5F.** Heatmaps of the potential hubs as per to the global top 5% of the *EC* DRN metric for the reference (WT) and mutant systems in complex with allosteric modulator: SANC00630. *EC* measurements of ligand-bound protomer (chain A) are shown on the left while those of the unbound protomer B are on the right. Residue hubs are annotated with their centrality values, while their homologous residues in alternate samples are not. The colour scale from white, through yellow, orange and red to black indicates the degree of residue centrality.

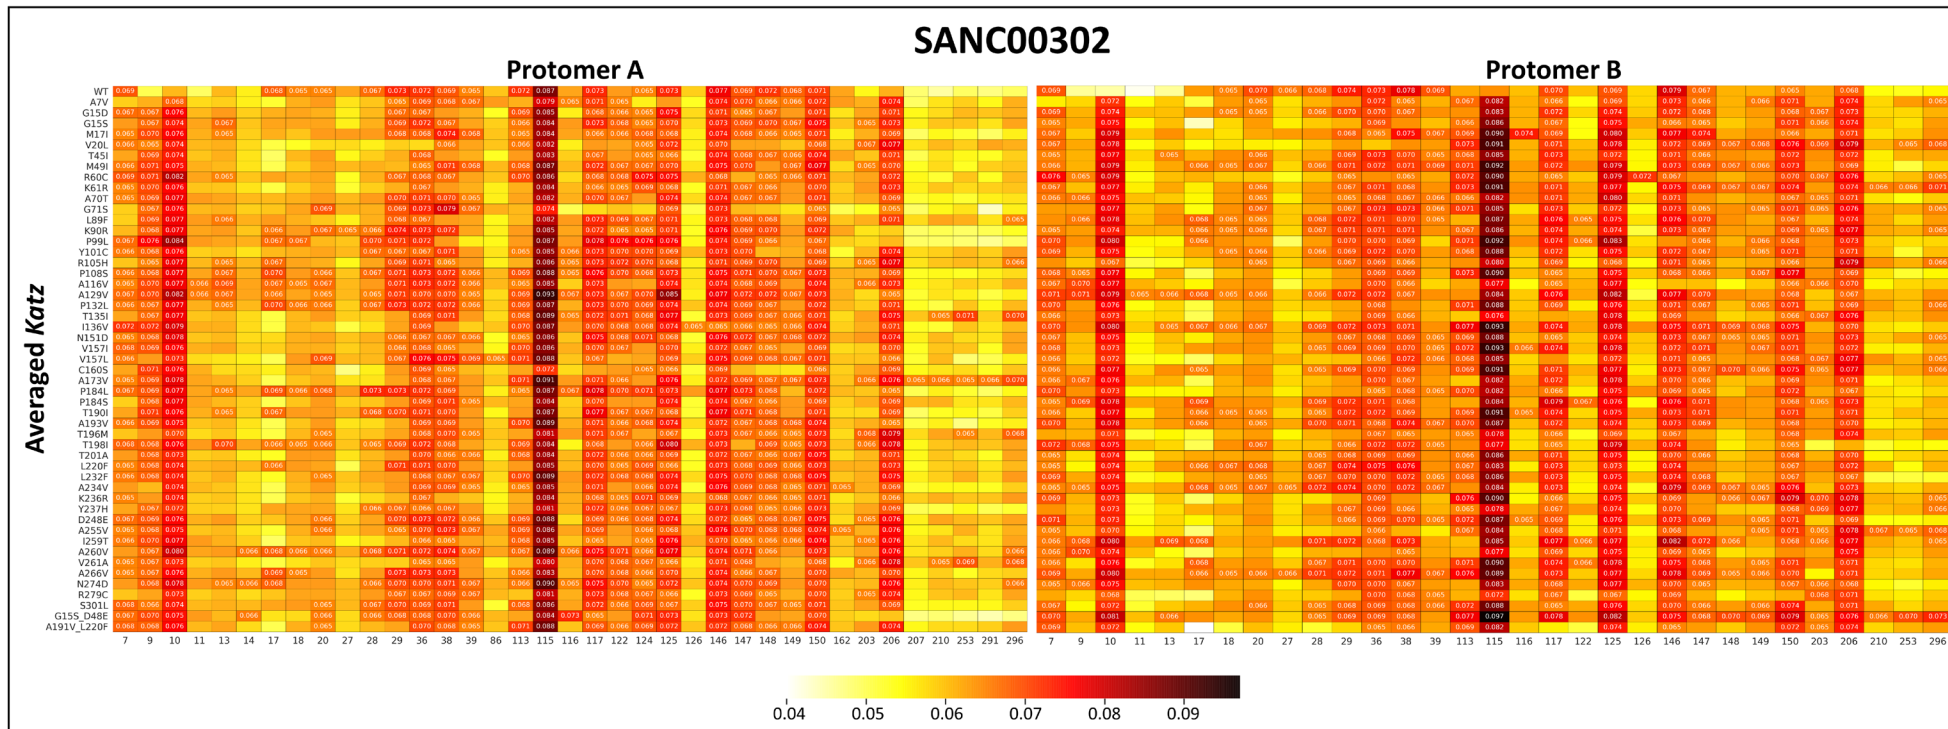

**Figure S6A.** Heatmaps of the potential hubs as per to the global top 5% of the *Katz* DRN metric for the reference (WT) and mutant systems in complex with allosteric modulator: SANCO0302. *Katz* measurements of ligand-bound protomer (chain A) are shown on the left while those of the unbound protomer B are on the right. Residue hubs are annotated with their centrality values, while their homologous residues in alternate samples are not. The colour scale from white, through yellow, orange and red to black indicates the degree of residue centrality.

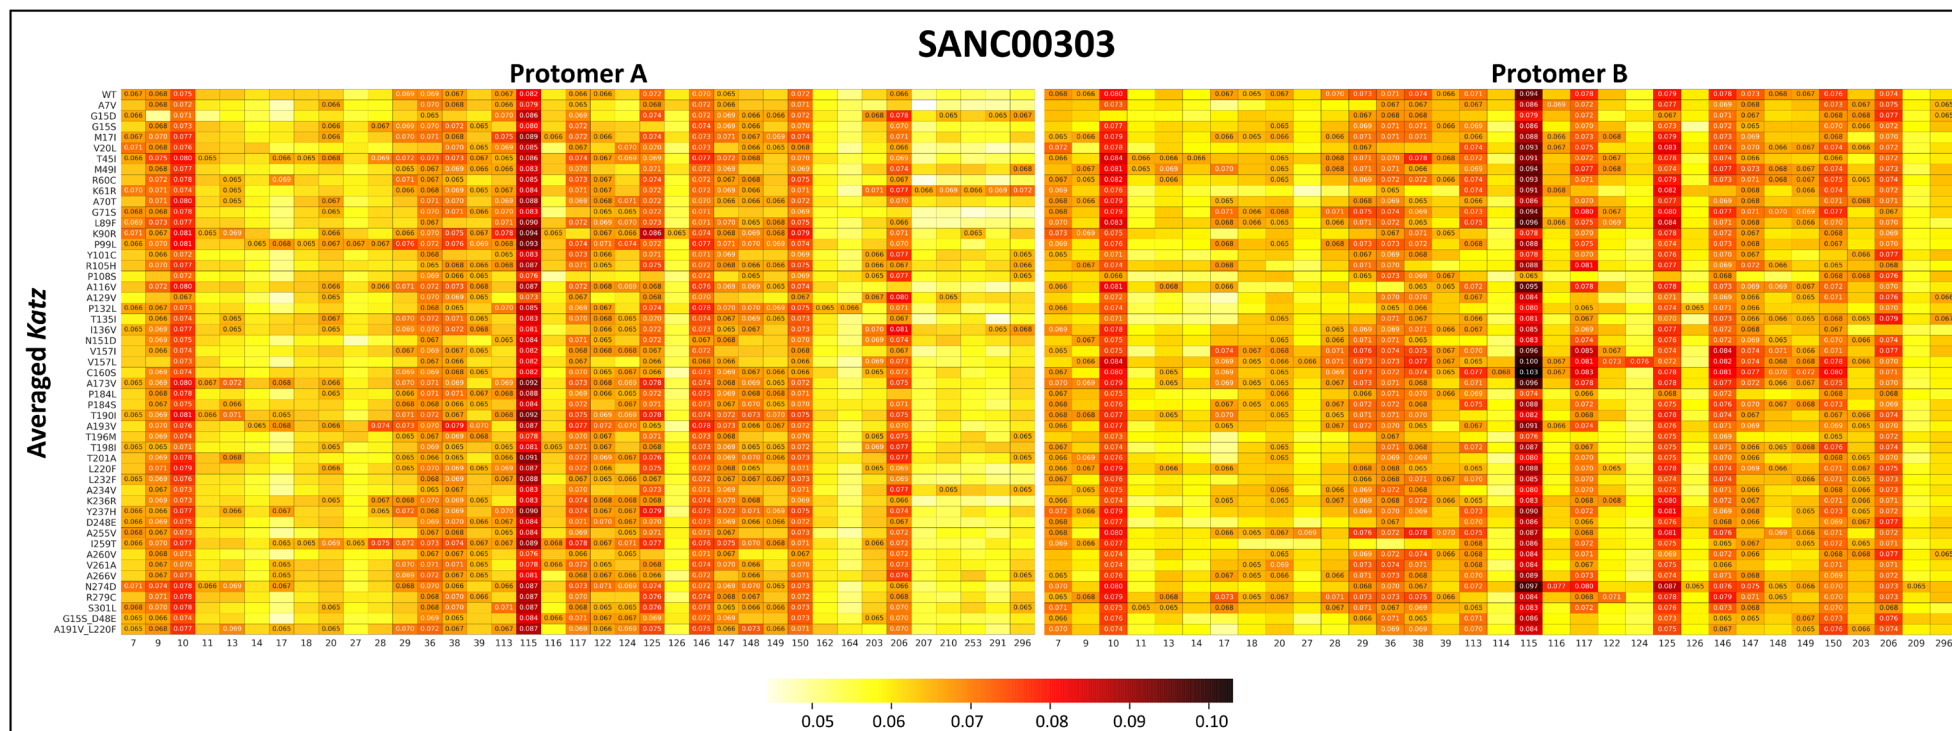

**Figure S6B.** Heatmaps of the potential hubs as per to the global top 5% of the *Katz* DRN metric for the reference (WT) and mutant systems in complex with allosteric modulator: SANC00303. *Katz* measurements of ligand-bound protomer (chain A) are shown on the left while those of the unbound protomer B are on the right. Residue hubs are annotated with their centrality values, while their homologous residues in alternate samples are not. The colour scale from white, through yellow, orange and red to black indicates the degree of residue centrality.

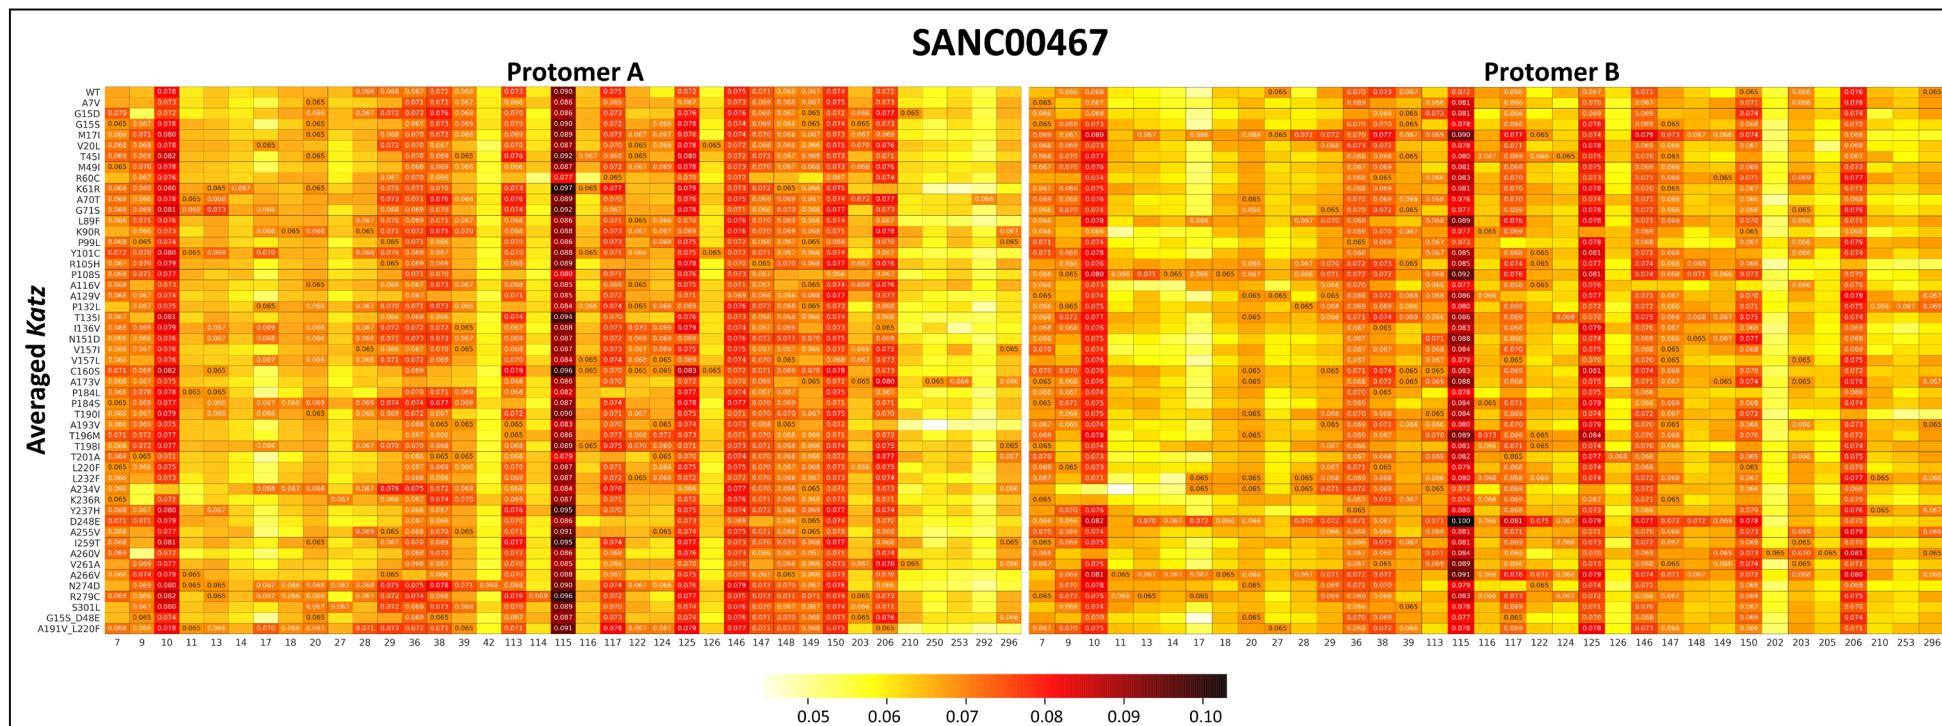

**Figure S6C.** Heatmaps of the potential hubs as per to the global top 5% of the *Katz* DRN metric for the reference (WT) and mutant systems in complex with allosteric modulator: SANC00467. *Katz* measurements of ligand-bound protomer (chain A) are shown on the left while those of the unbound protomer B are on the right. Residue hubs are annotated with their centrality values, while their homologous residues in alternate samples are not. The colour scale from white, through yellow, orange and red to black indicates the degree of residue centrality.



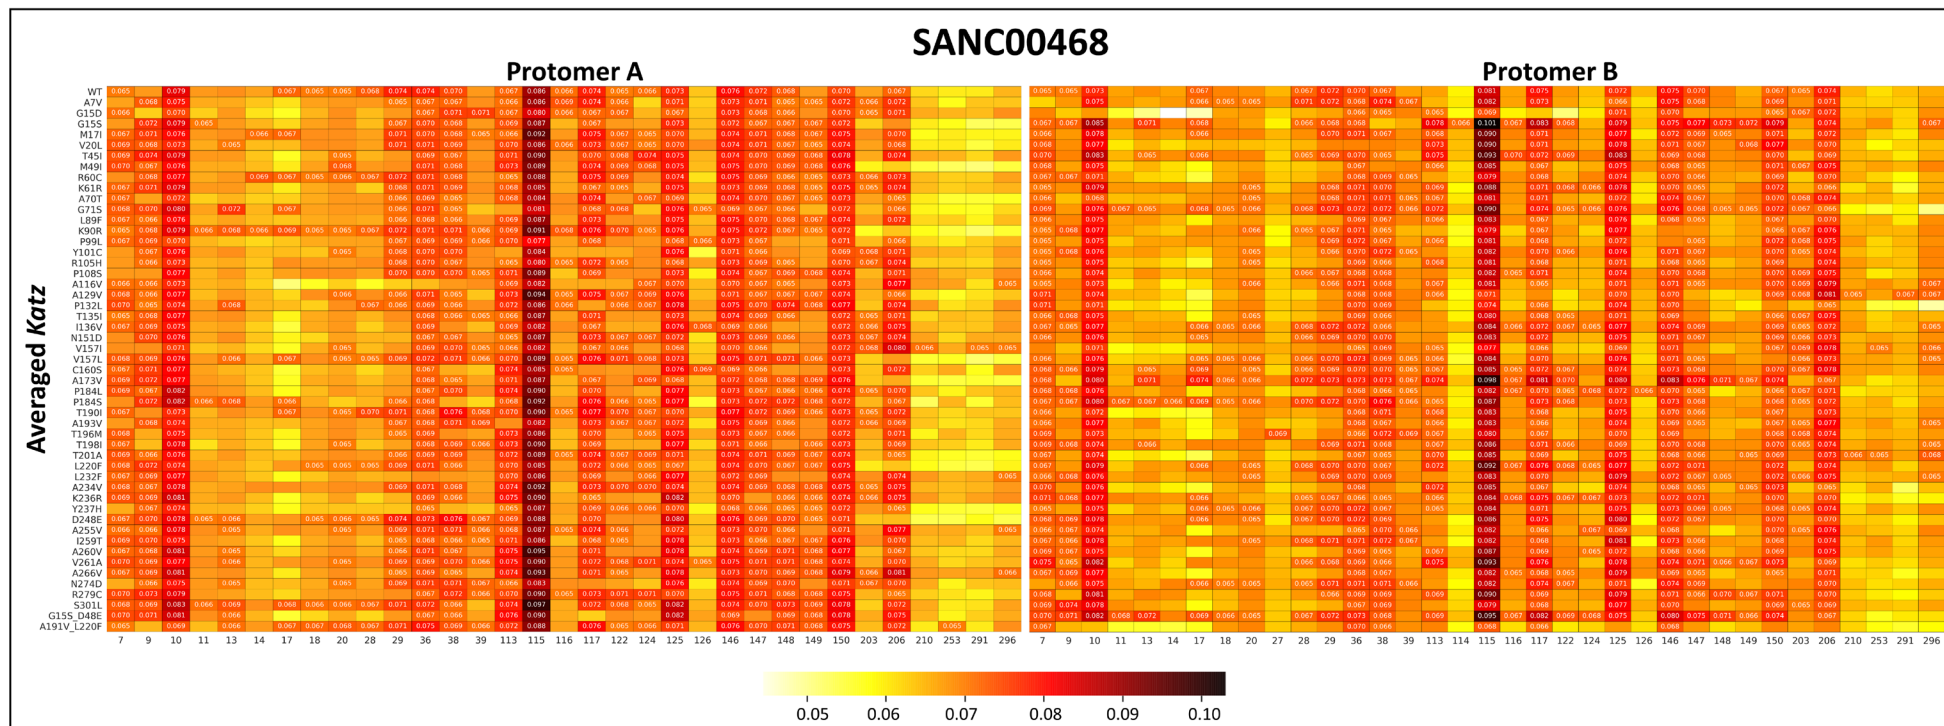

**Figure S6D.** Heatmaps of the potential hubs as per to the global top 5% of the *Katz* DRN metric for the reference (WT) and mutant systems in complex with allosteric modulator: SANC00468. *Katz* measurements of ligand-bound protomer (chain A) are shown on the left while those of the unbound protomer B are on the right. Residue hubs are annotated with their centrality values, while their homologous residues in alternate samples are not. The colour scale from white, through yellow, orange and red to black indicates the degree of residue centrality.

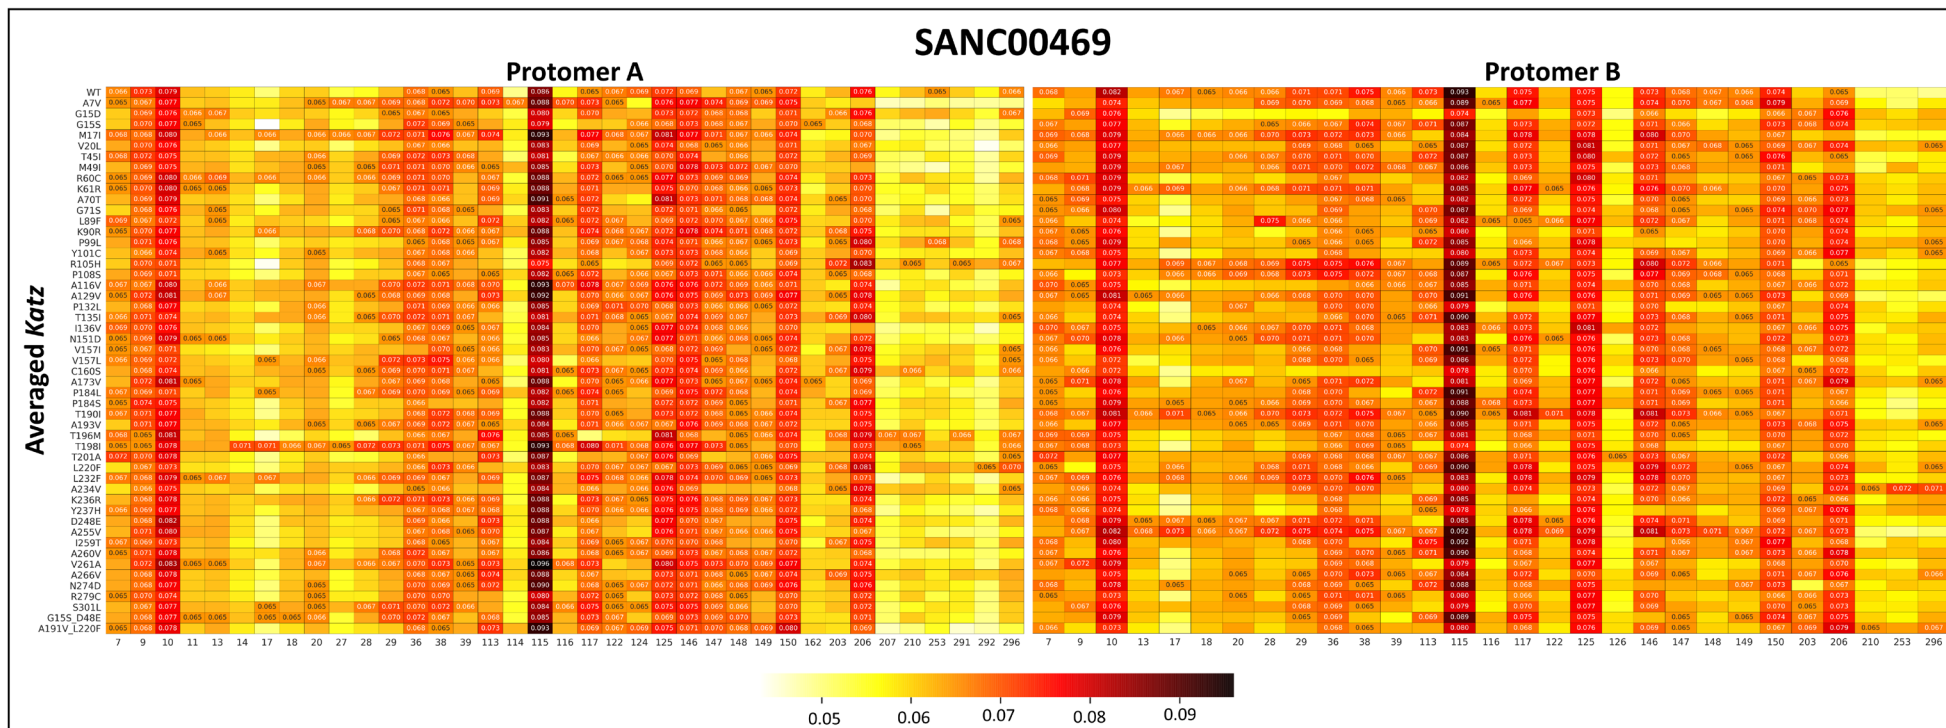

**Figure S6E.** Heatmaps of the potential hubs as per to the global top 5% of the *Katz* DRN metric for the reference (WT) and mutant systems in complex with allosteric modulator: SANC00469. *Katz* measurements of ligand-bound protomer (chain A) are shown on the left while those of the unbound protomer B are on the right. Residue hubs are annotated with their centrality values, while their homologous residues in alternate samples are not. The colour scale from white, through yellow, orange and red to black indicates the degree of residue centrality.

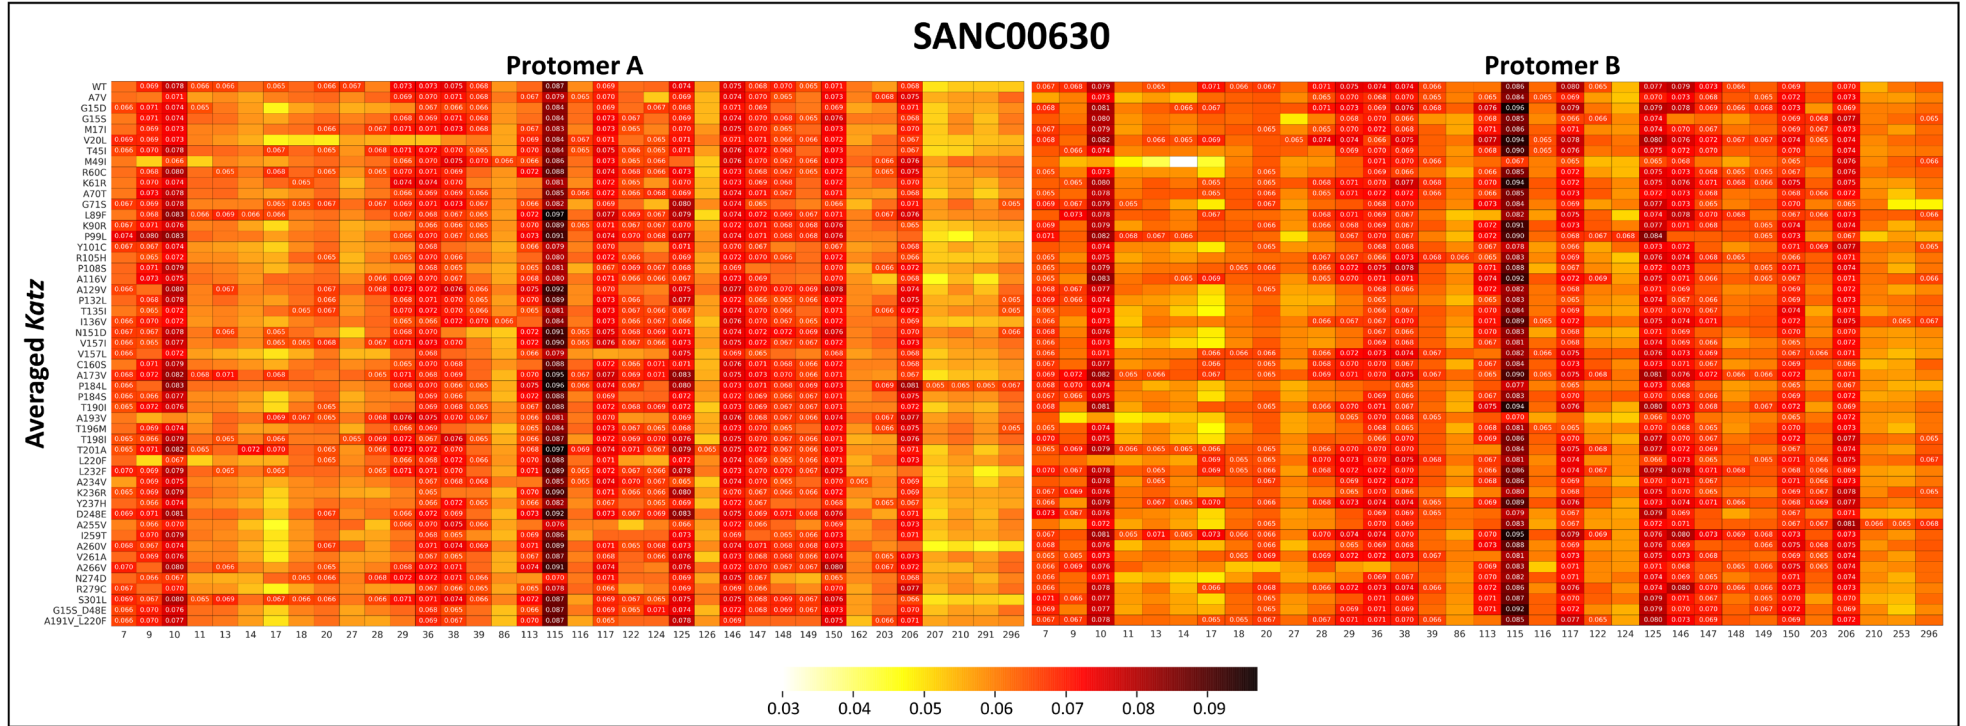

**Figure S6F.** Heatmaps of the potential hubs as per to the global top 5% of the *Katz* DRN metric for the reference (WT) and mutant systems in complex with allosteric modulator: SANC00630. *Katz* measurements of ligand-bound protomer (chain A) are shown on the left while those of the unbound protomer B are on the right. Residue hubs are annotated with their centrality values, while their homologous residues in alternate samples are not. The colour scale from white, through yellow, orange and red to black indicates the degree of residue centrality.
